# Supplementary material for: A computational study of the vibrationally-resolved electronic circular dichroism spectra of single-chain transoid and cisoid oligothiophenes in chiral conformations
Source: Royal Society of Chemistry journal article supplement (doi:10.1039/c8cp03482f), 2018-01-01
Supplement: c8cp03482f1.pdf [file c8cp03482f1.pdf]

# A Computational Study of Electronic Circular Dichroism Spectra of Single-Chain Transoid and Cisoid Oligothiophenes in Chiral Conformation.

## Electronic Supplementary Information

Daniel Aranda<sup>a,b</sup>, Javier Cerezo<sup>c</sup>, Gennaro Pescitelli<sup>d</sup>, Francisco J. Avila Ferrer<sup>a</sup>, Juan Soto<sup>a</sup>, Fabrizio Santoro<sup>b\*</sup>

<sup>a</sup> *Department of Physical Chemistry, Faculty of Science, University of Málaga, E-29071-Málaga, Spain.*

<sup>b</sup> *Consiglio Nazionale delle Ricerche – CNR, Istituto di Chimica dei Composti Organo Metallici (ICCOM-CNR), UOS di Pisa, Via G. Moruzzi 1, I-56124 Pisa, Italy†. E-mail:fabrizio.santoro@pi.iccom.cnr.it*

<sup>c</sup> *Department of Physical Chemistry, Faculty of Chemistry, University of Murcia, E-30100-Murcia, Spain.*

<sup>d</sup> *Università di Pisa, Dipartimento di Chimica e Chimica Industriale Via G. Moruzzi, 13, I-56124 Pisa, Italy.*

Table S1a. Oscillator strength (OS), vertical energy (VE) and rotatory strength (RS) for the three first excited states of transoid T<sub>13</sub> at  $\theta=15^\circ$  with different basis sets.

|                | S1     |         |                            | S2     |         |                            | S3     |         |                            |
|----------------|--------|---------|----------------------------|--------|---------|----------------------------|--------|---------|----------------------------|
|                | OS     | VE (eV) | RS (10 <sup>-40</sup> cgs) | OS     | VE (eV) | RS (10 <sup>-40</sup> cgs) | OS     | VE (eV) | RS (10 <sup>-40</sup> cgs) |
| 6-31G(d)       | 4.9906 | 2.7657  | 338                        | 0.0000 | 3.0409  | 0                          | 0.3856 | 3.3382  | 29                         |
| 6-311G(d,p)    | 4.8447 | 2.7309  | 340                        | 0.0000 | 2.9959  | 0                          | 0.3707 | 3.2803  | 29                         |
| 6-311+G(2d,p)  | 4.6701 | 2.6755  | 380                        | 0.0000 | 2.929   | 0                          | 0.3469 | 3.1974  | 32                         |
| 6-311+G(2d,2p) | 4.6621 | 2.6739  | 381                        | 0.0000 | 2.9272  | 0                          | 0.3464 | 3.1954  | 32                         |

Table S1b. Oscillator strength (OS), vertical energy (VE) and rotatory strength (RS) for the three first excited states of cisoid T<sub>13</sub> at  $\theta=15^\circ$  with different basis sets.

|                | S1     |         |                            | S2     |         |                            | S3     |         |                            |
|----------------|--------|---------|----------------------------|--------|---------|----------------------------|--------|---------|----------------------------|
|                | OS     | VE (eV) | RS (10 <sup>-40</sup> cgs) | OS     | VE (eV) | RS (10 <sup>-40</sup> cgs) | OS     | VE (eV) | RS (10 <sup>-40</sup> cgs) |
| 6-31G(d)       | 1.3158 | 2.6940  | 8011                       | 1.8776 | 2.9922  | -9400                      | 1.7222 | 3.3247  | 591                        |
| 6-311G(d,p)    | 1.2810 | 2.6574  | 7831                       | 1.8125 | 2.9479  | -9114                      | 1.6555 | 3.2711  | 579                        |
| 6-311+G(2d,p)  | 1.2265 | 2.6070  | 7642                       | 1.7031 | 2.8857  | -8750                      | 1.5319 | 3.1926  | 481                        |
| 6-311+G(2d,2p) | 1.2246 | 2.6055  | 7629                       | 1.7011 | 2.8839  | -8715                      | 1.5304 | 3.1905  | 482                        |

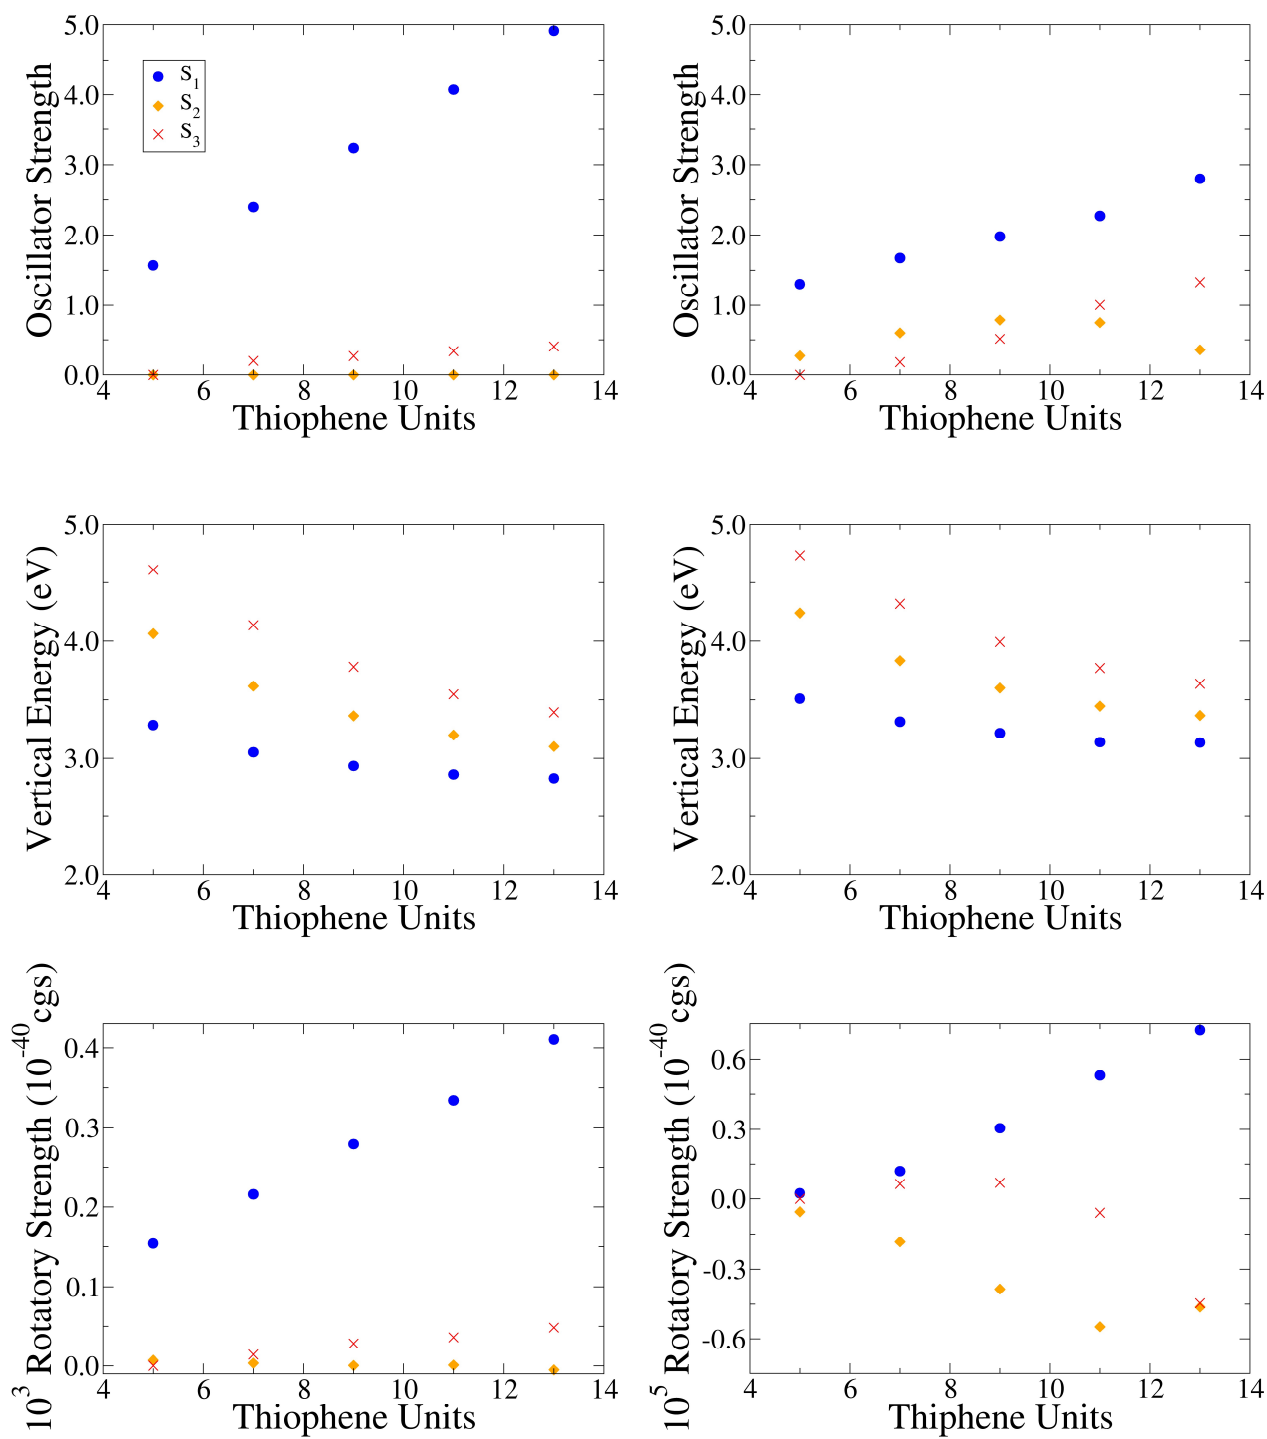

**Figure S1.** Oscillator Strength (top), Vertical Transition Energy (middle) and Rotatory Strength (bottom) dependence with the number of thiophene units for the all-trans (left) and all-cis (right) molecules of class *I*.

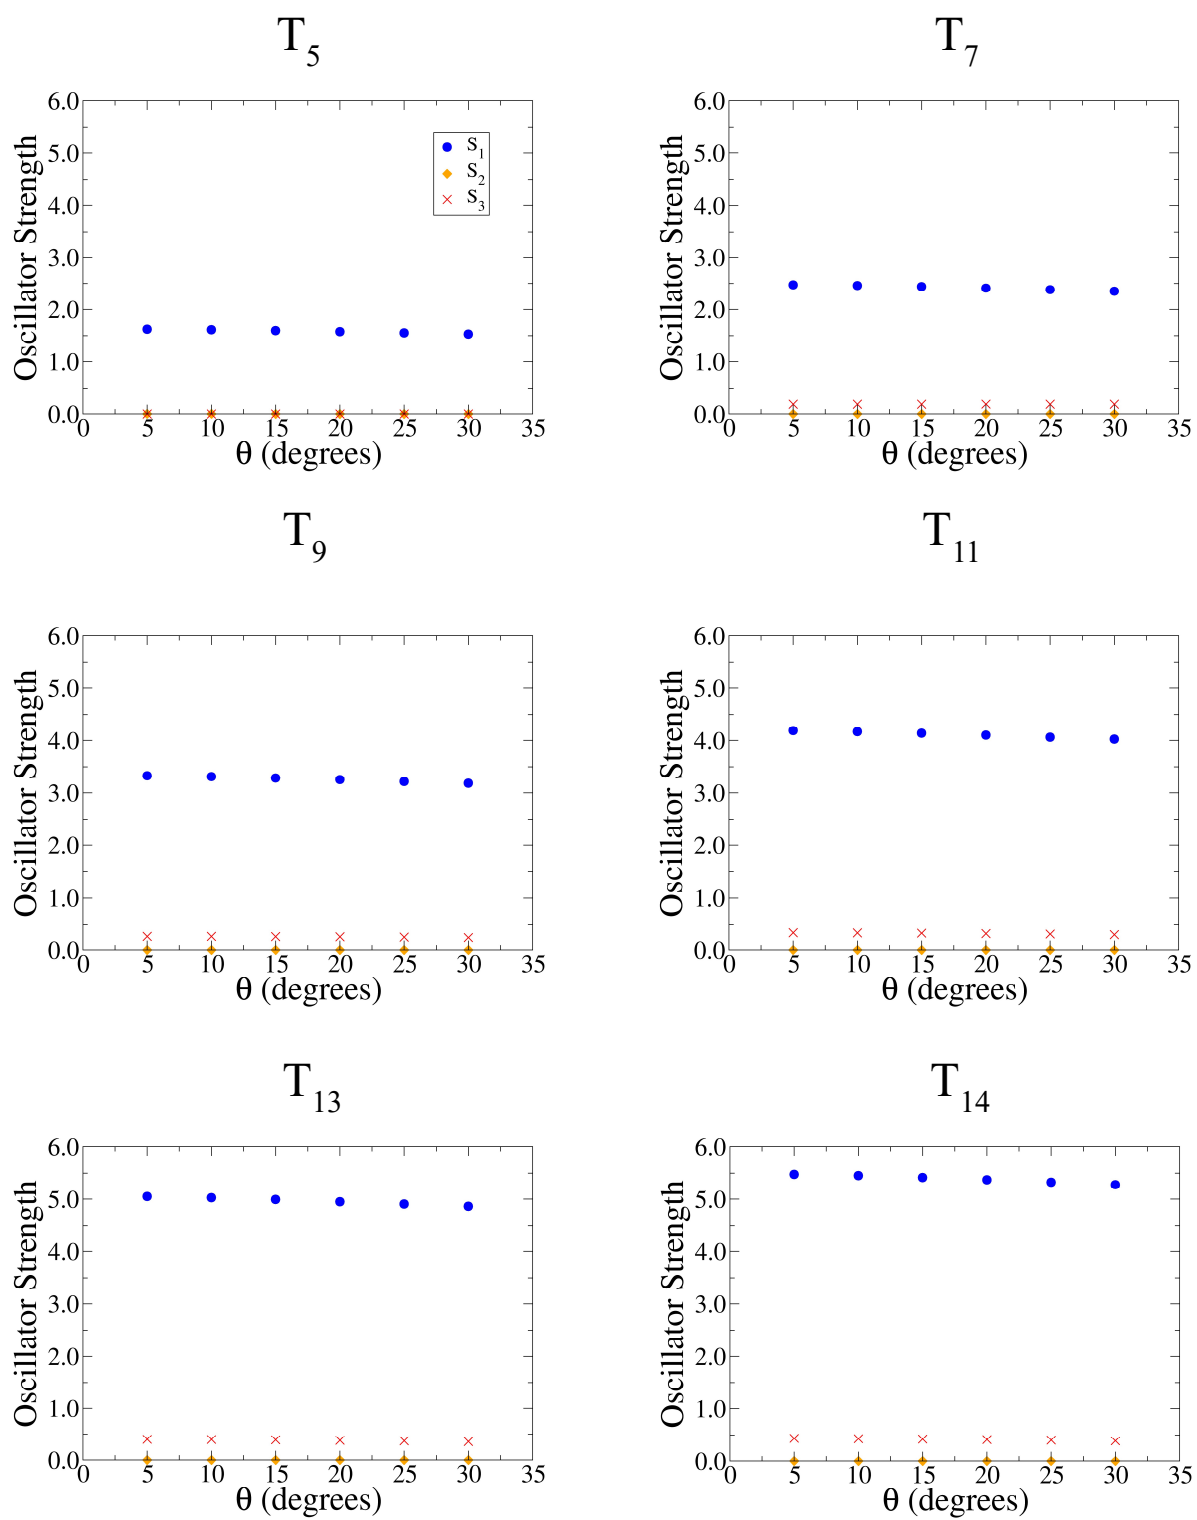

**Figure S2.** Oscillator Strength dependence with  $\theta$  for  $S_1$ ,  $S_2$  and  $S_3$  of the all-trans molecules of class II.



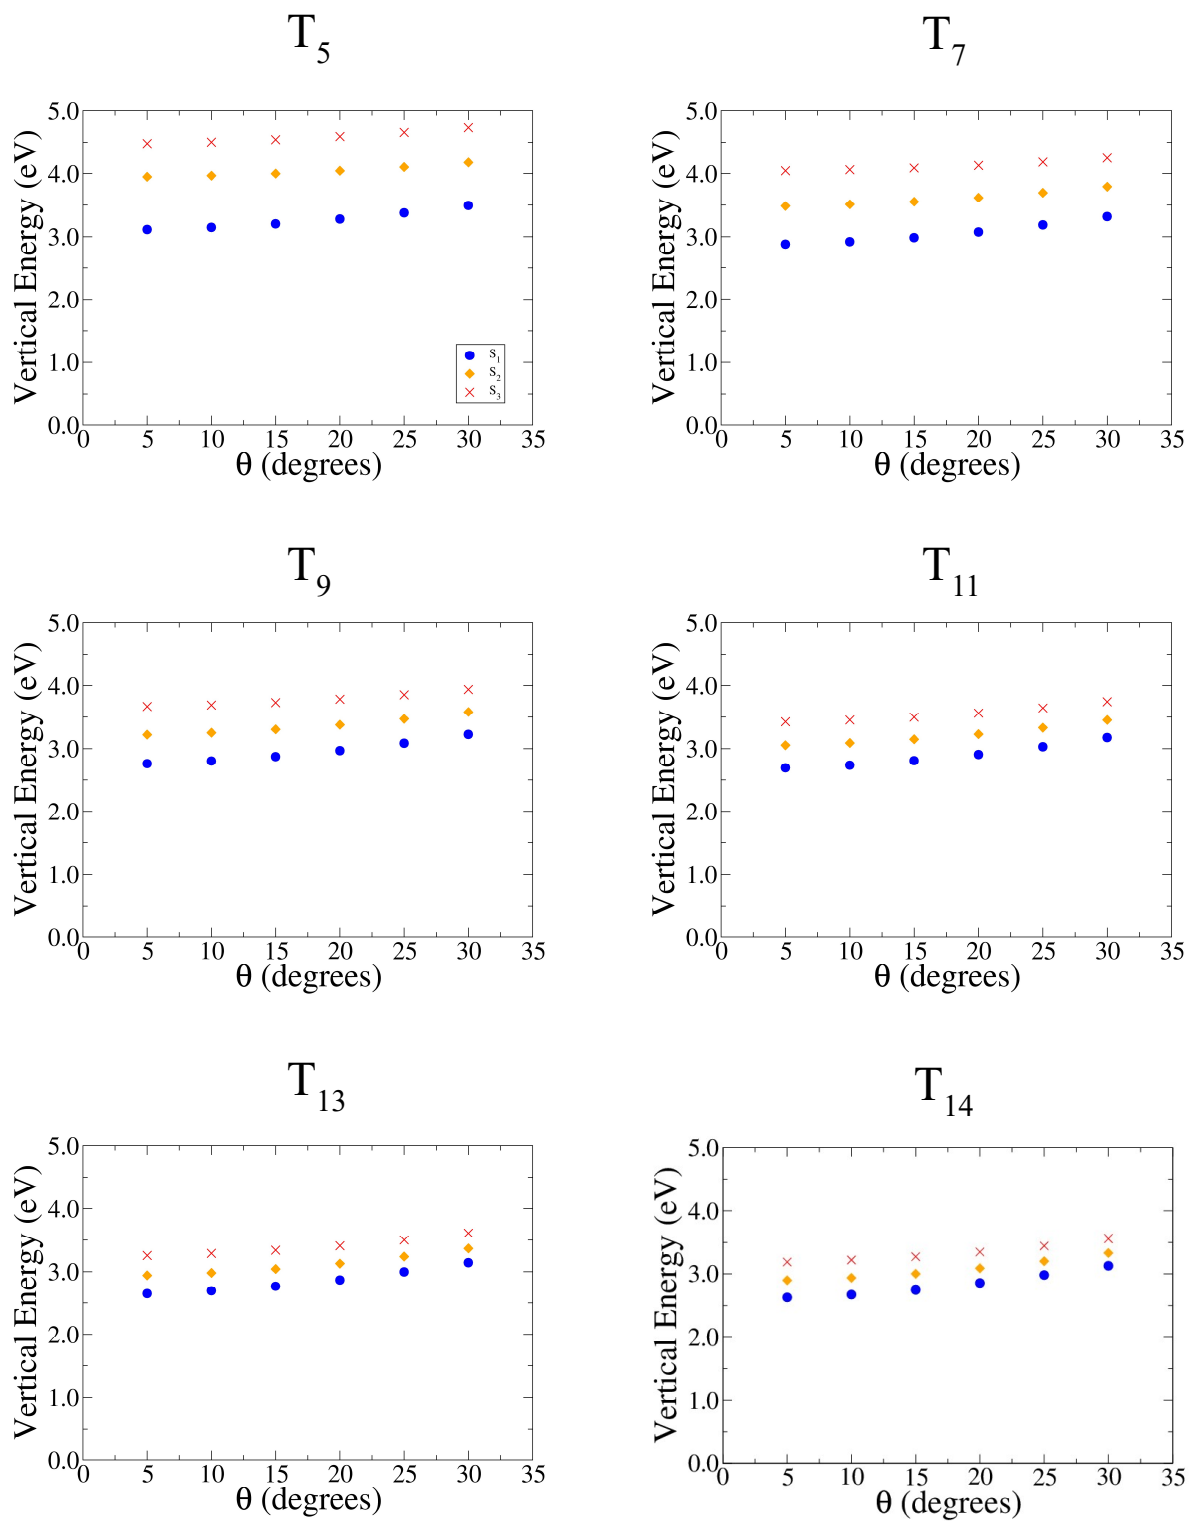

**Figure S3.** Vertical Transition Energy dependence with  $\theta$  for  $S_1$ ,  $S_2$  and  $S_3$  of the all-trans molecules of class II.

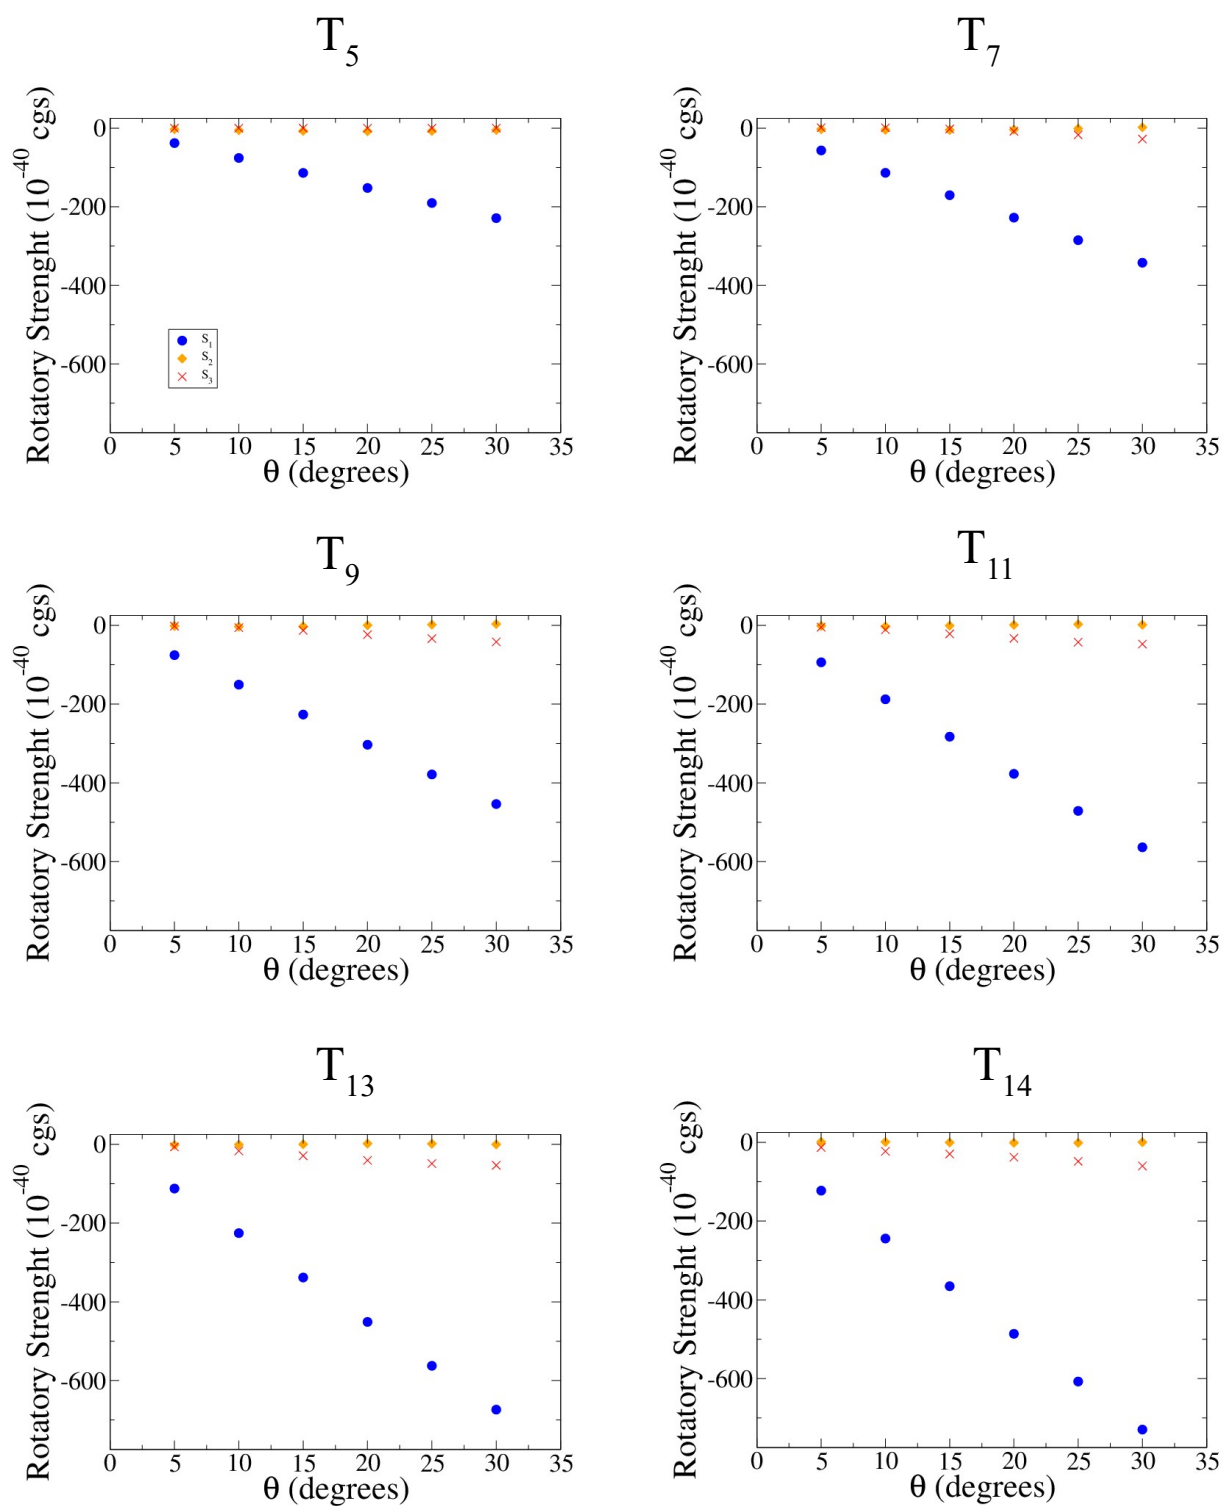

**Figure S4.** Rotatory Strength dependence with  $\theta$  for  $S_1$ ,  $S_2$  and  $S_3$  of the all-trans molecules of class II.

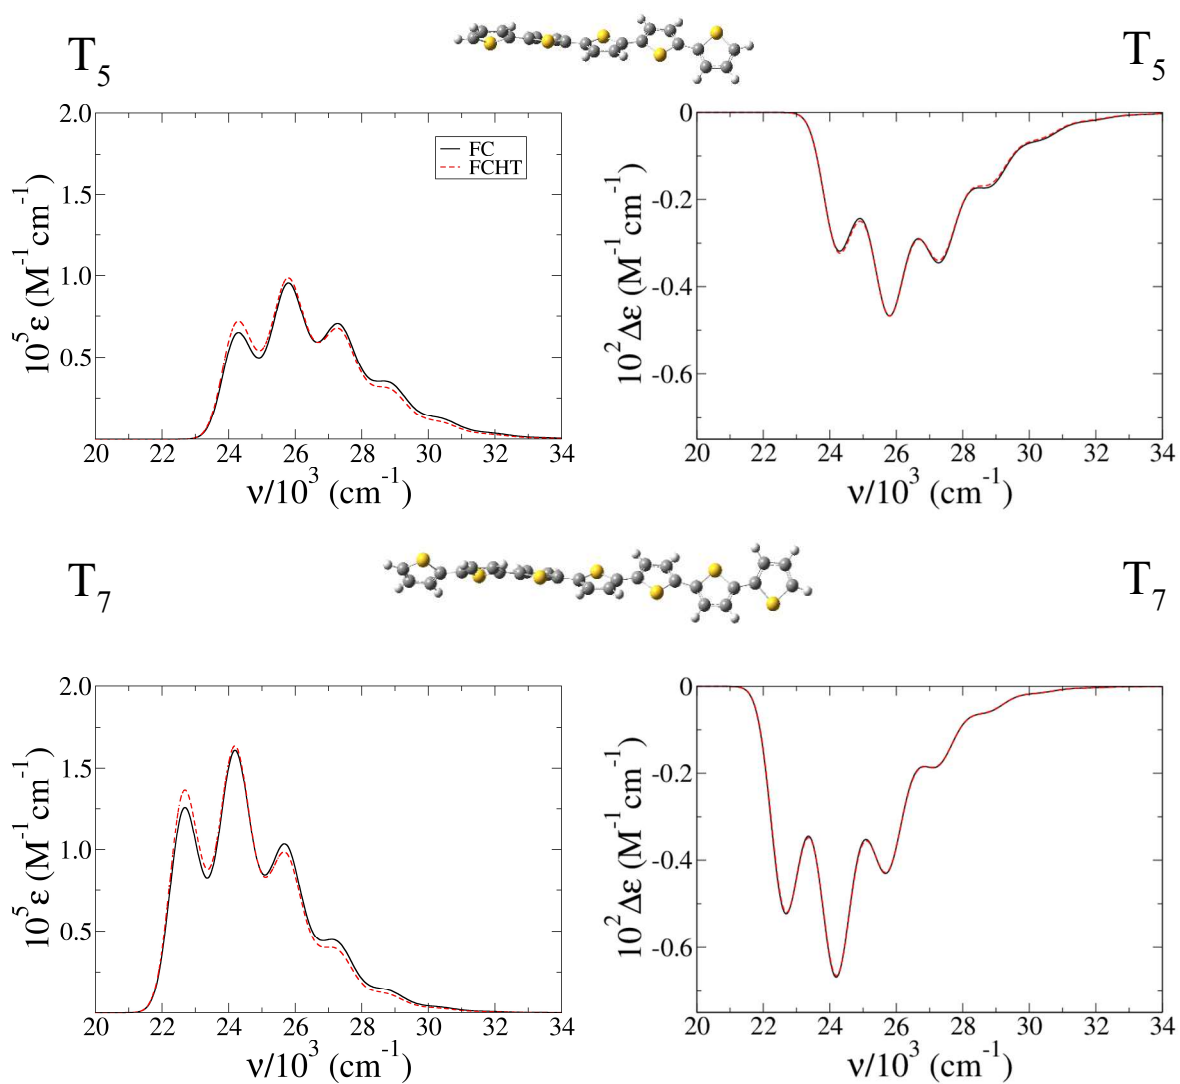

**Figure S5.** FC and FCHT absorption (left) and ECD (right) spectra computed for the *class I* structure of  $T_5$ , and  $T_7$  transoid twisted ribbons at 0K and broadened with a Gaussian with HWHM=450  $\text{cm}^{-1}$ . Inter-ring torsion angles are considered frozen during the transition.

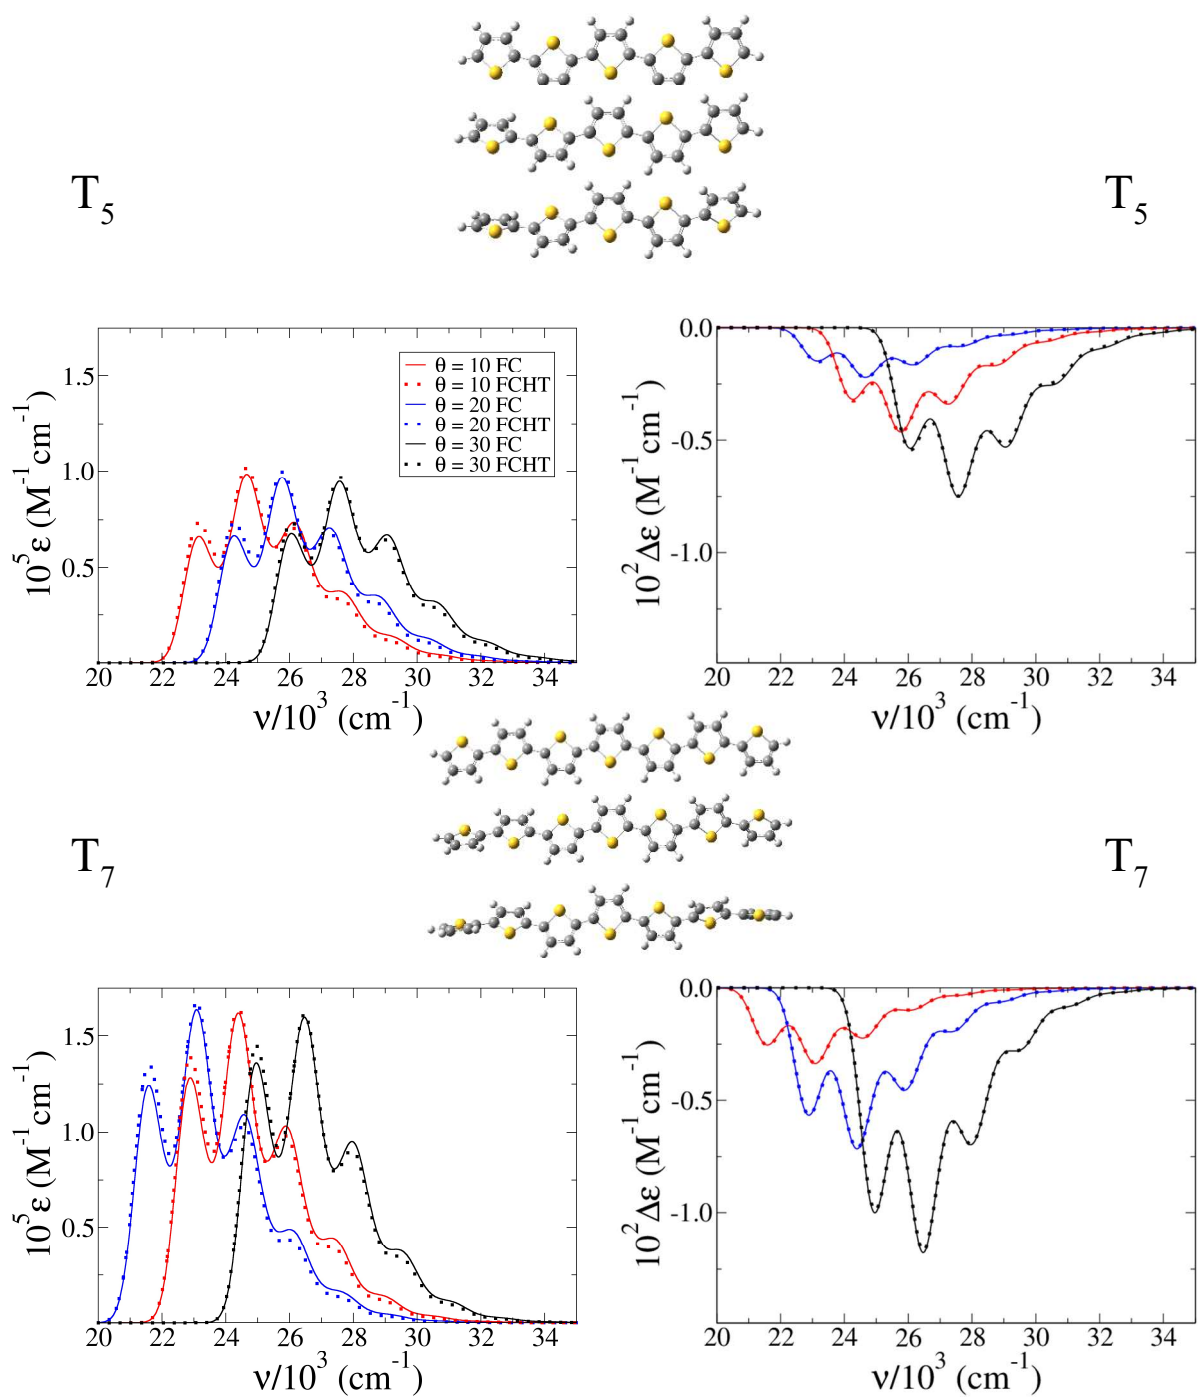

**Figure S6.** FC absorption (left) and ECD (right) spectra computed for the *class II* structure of  $T_5$ , and  $T_7$  transoid twisted ribbons at 0K and broadened with a Gaussian with HWHM=450  $\text{cm}^{-1}$  at different torsion angles (considered frozen during the transition).

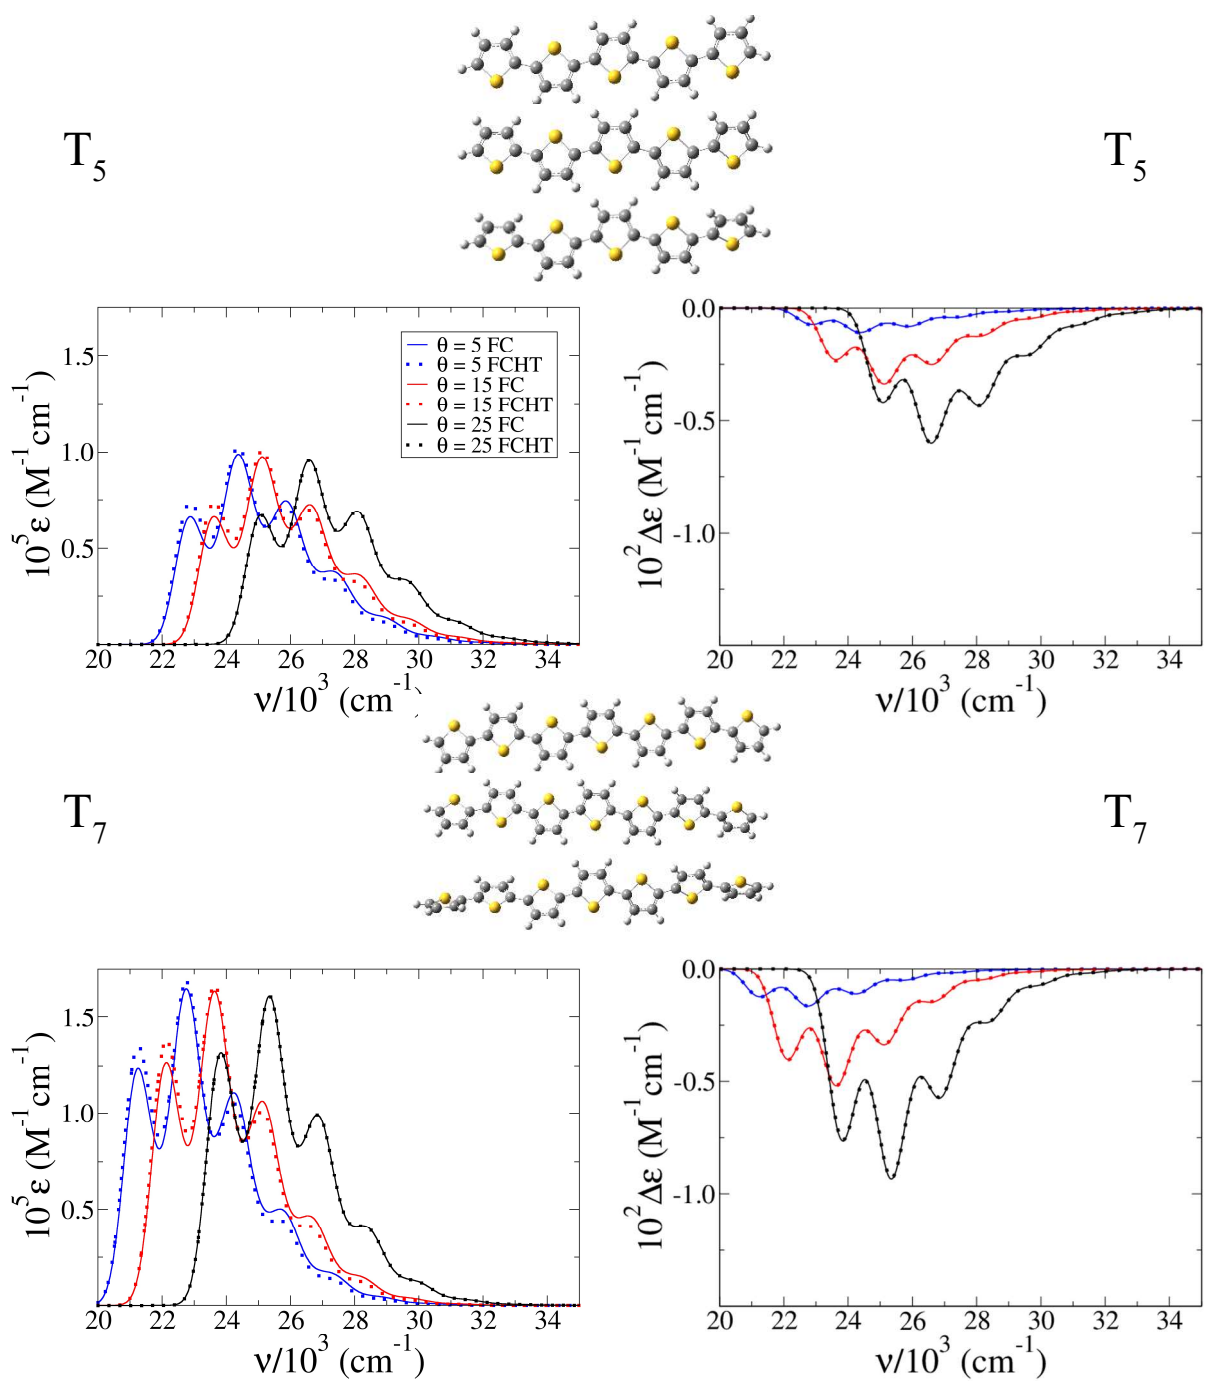

**Figure S7.** FC absorption (left) and ECD (right) spectra computed for the *class II* structure of  $T_5$ , and  $T_7$  transoid twisted ribbons at 0K and broadened with a Gaussian with HWHM=450  $\text{cm}^{-1}$  at different torsion angles (considered frozen during the transition).

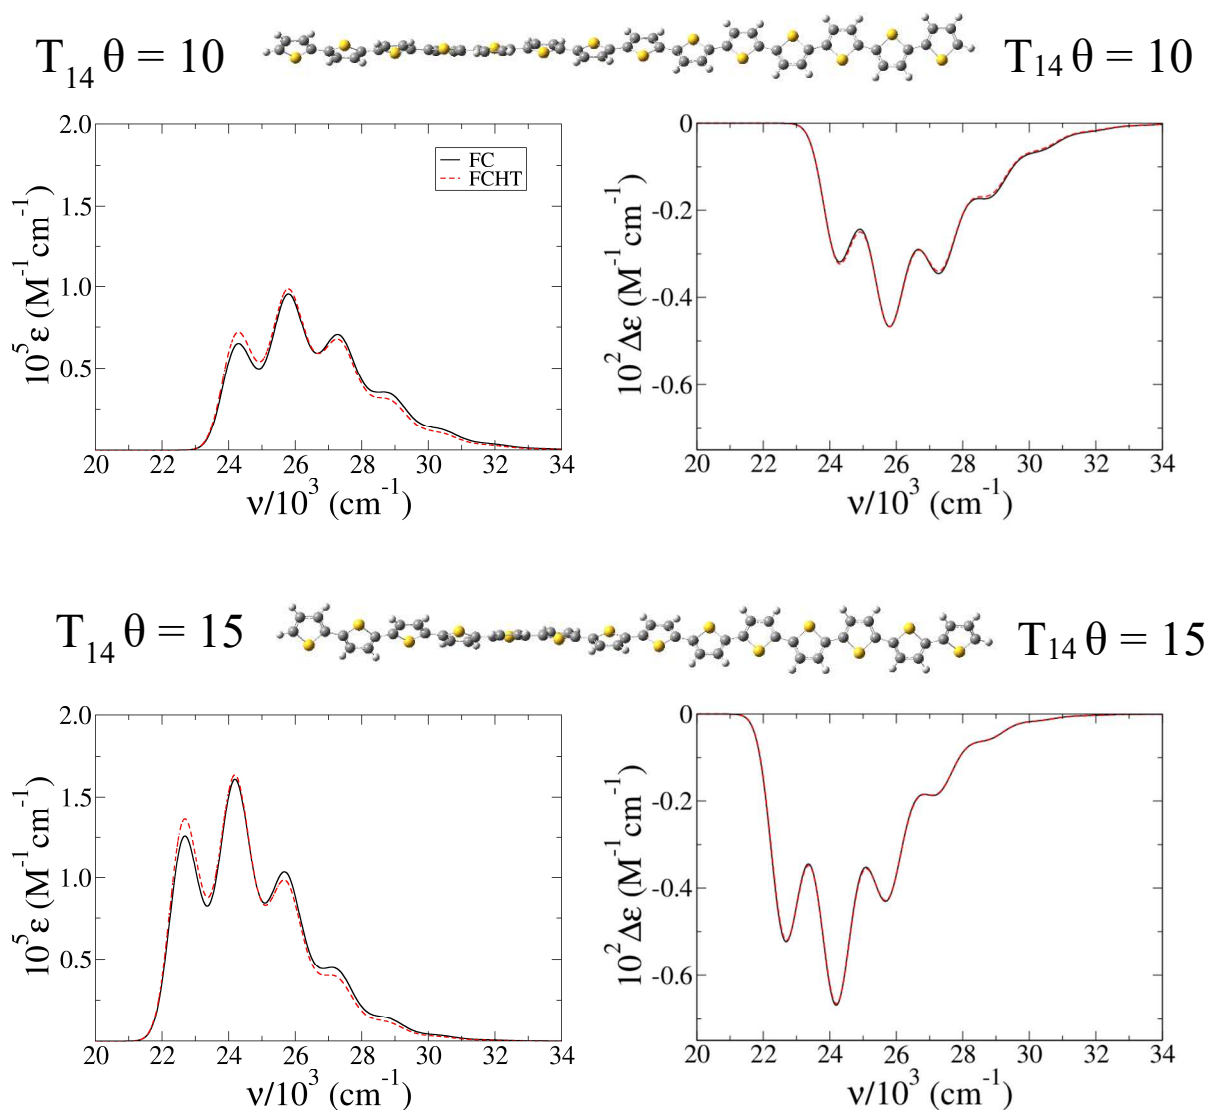

**Figure S8.** FC and FCHT absorption (left) and ECD (right) spectra computed for the *class II* structure of  $T_{14}$  with  $\theta = 10$  (top) and  $\theta = 15$  (bottom) transoid twisted ribbons at 0K and broadened with a Gaussian with HWHM=450  $\text{cm}^{-1}$ . Inter-ring torsion angles are considered frozen during the transition.

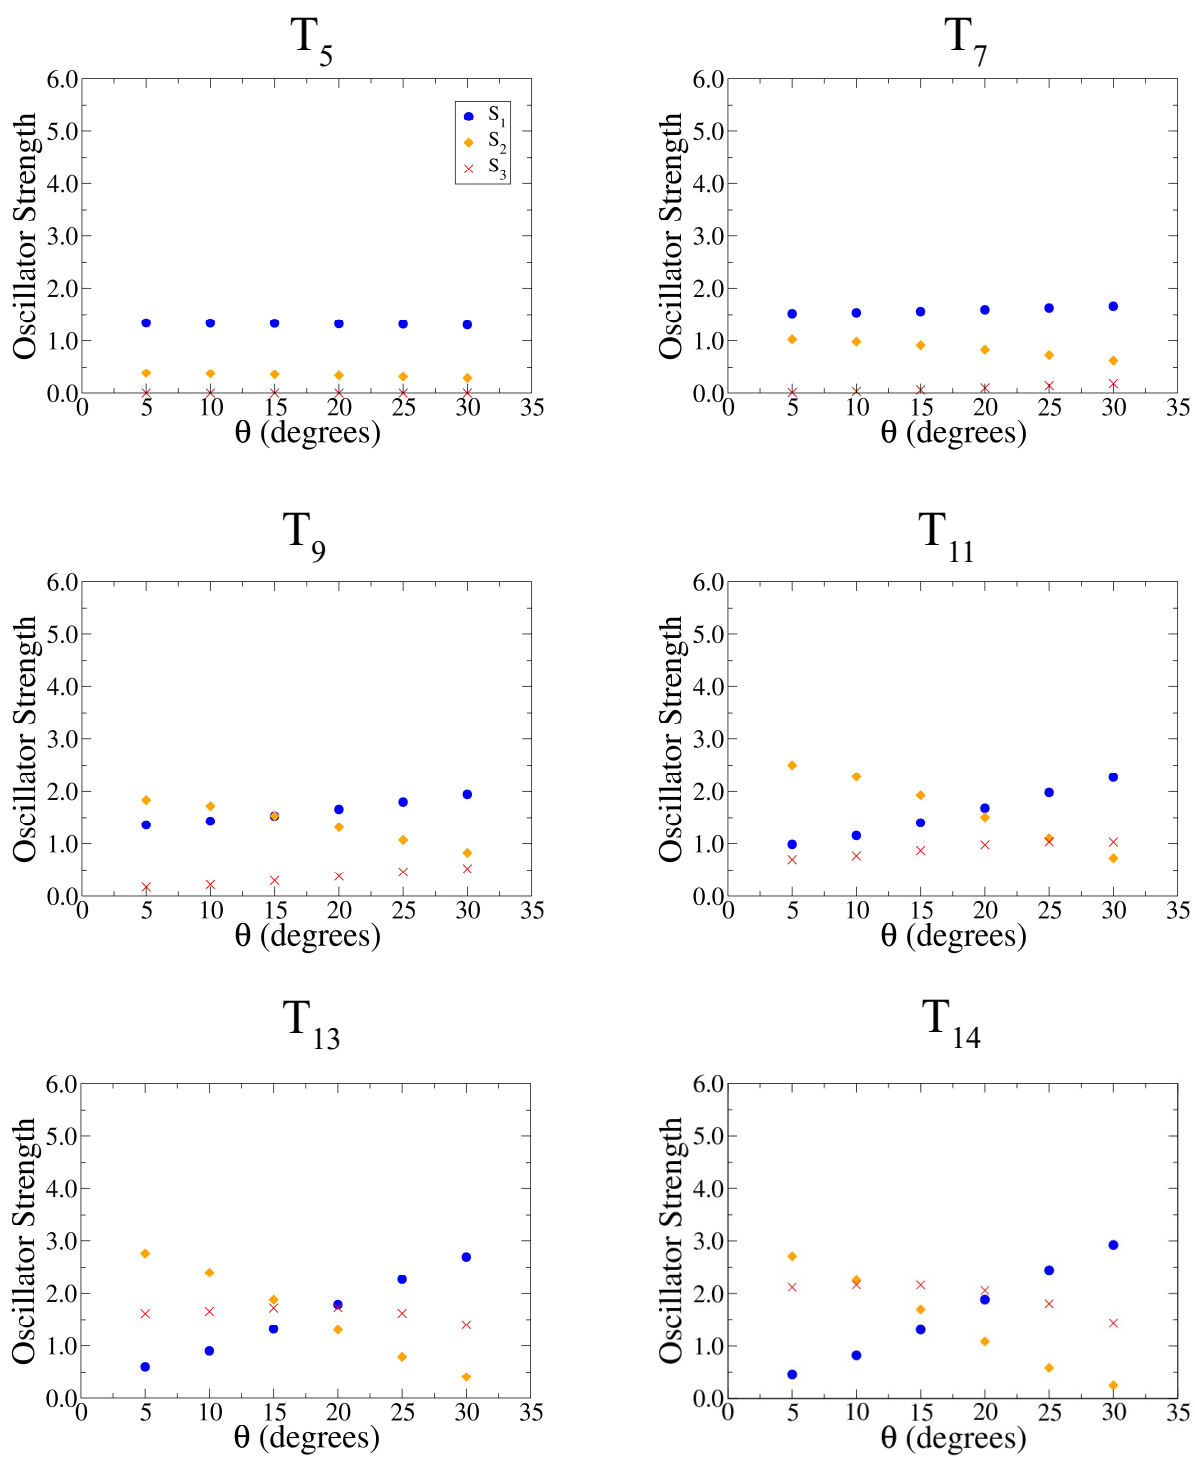

**Figure S9.** Oscillator Strength dependence with  $\theta$  for  $S_1$ ,  $S_2$  and  $S_3$  of the all-cis molecules of class *II*.

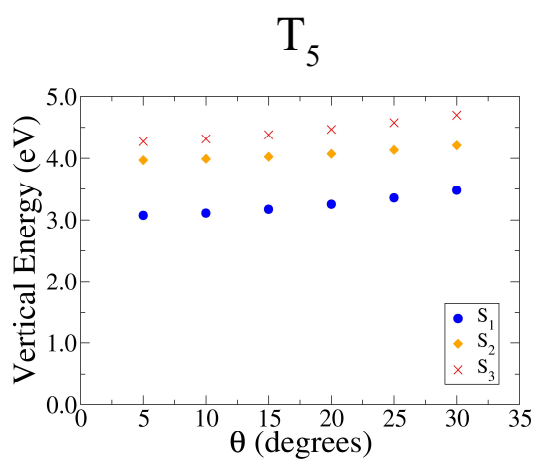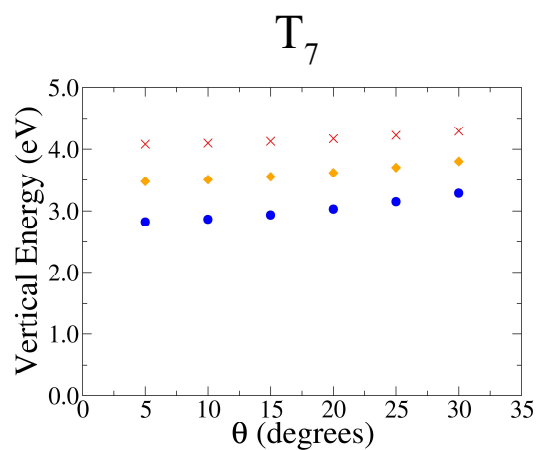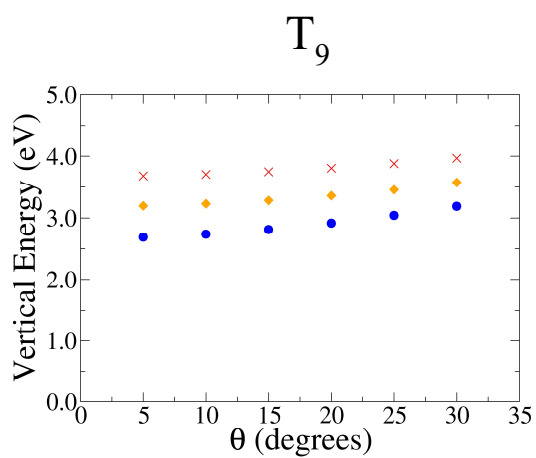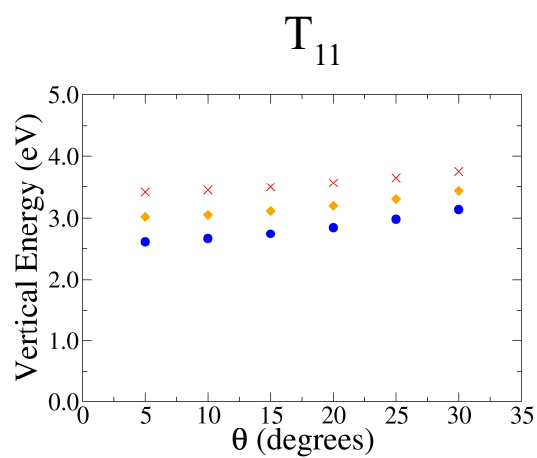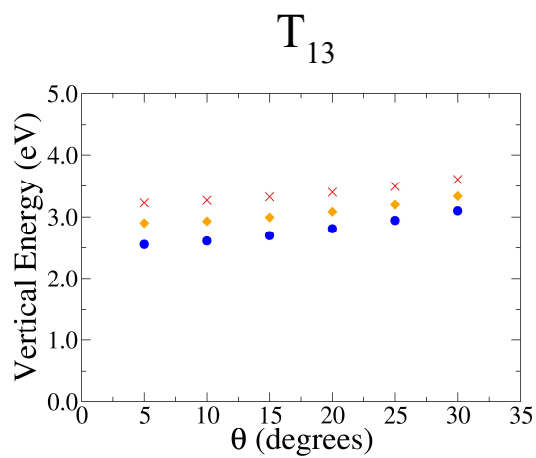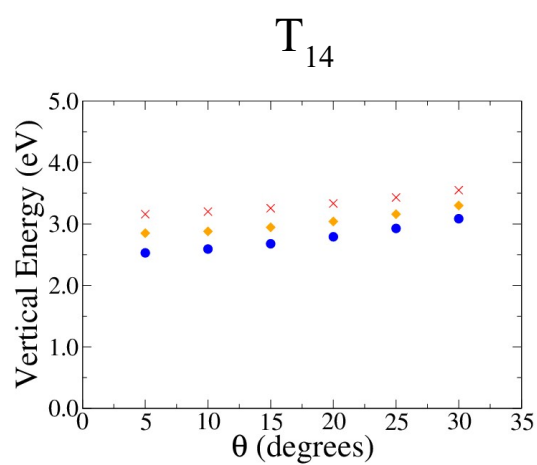

**Figure S10.** Vertical Transition Energy dependence with  $\theta$  for  $S_1$ ,  $S_2$  and  $S_3$  of the all-cis molecules of class II.



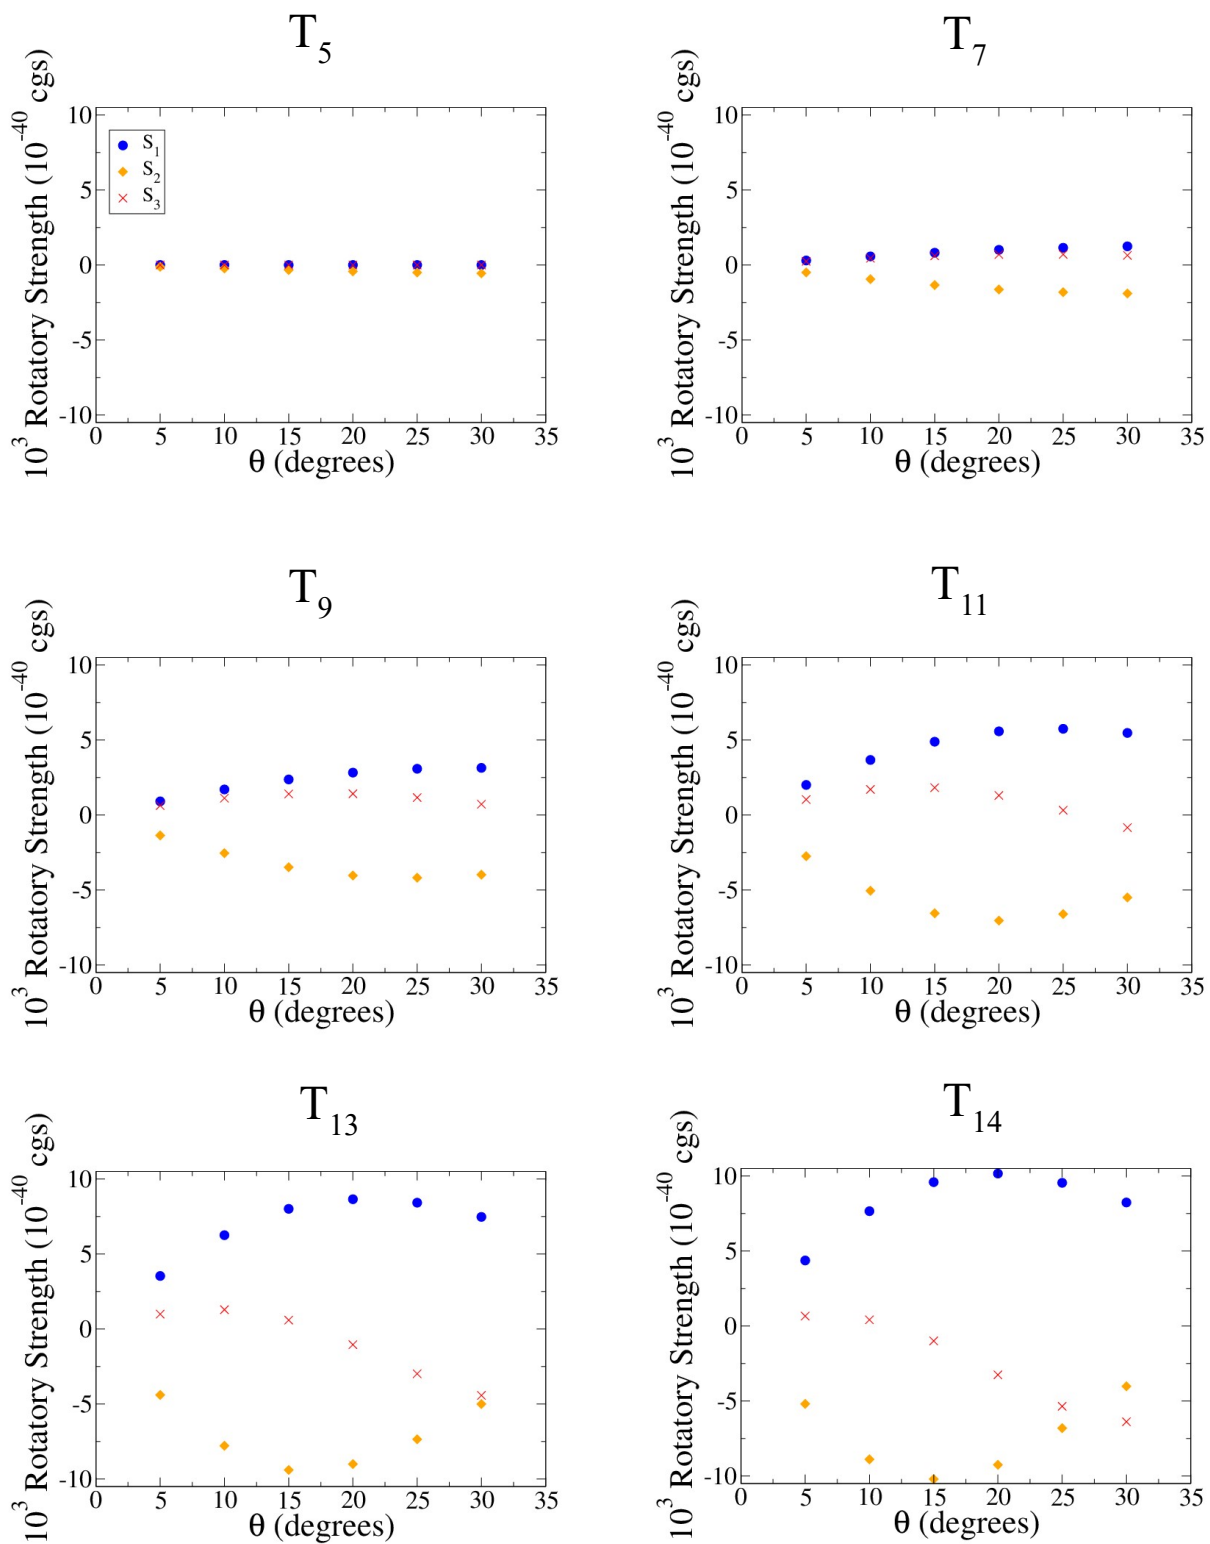

**Figure S11.** Rotatory Strength dependence with  $\theta$  for  $S_1$ ,  $S_2$  and  $S_3$  of the all-cis molecules of class II.

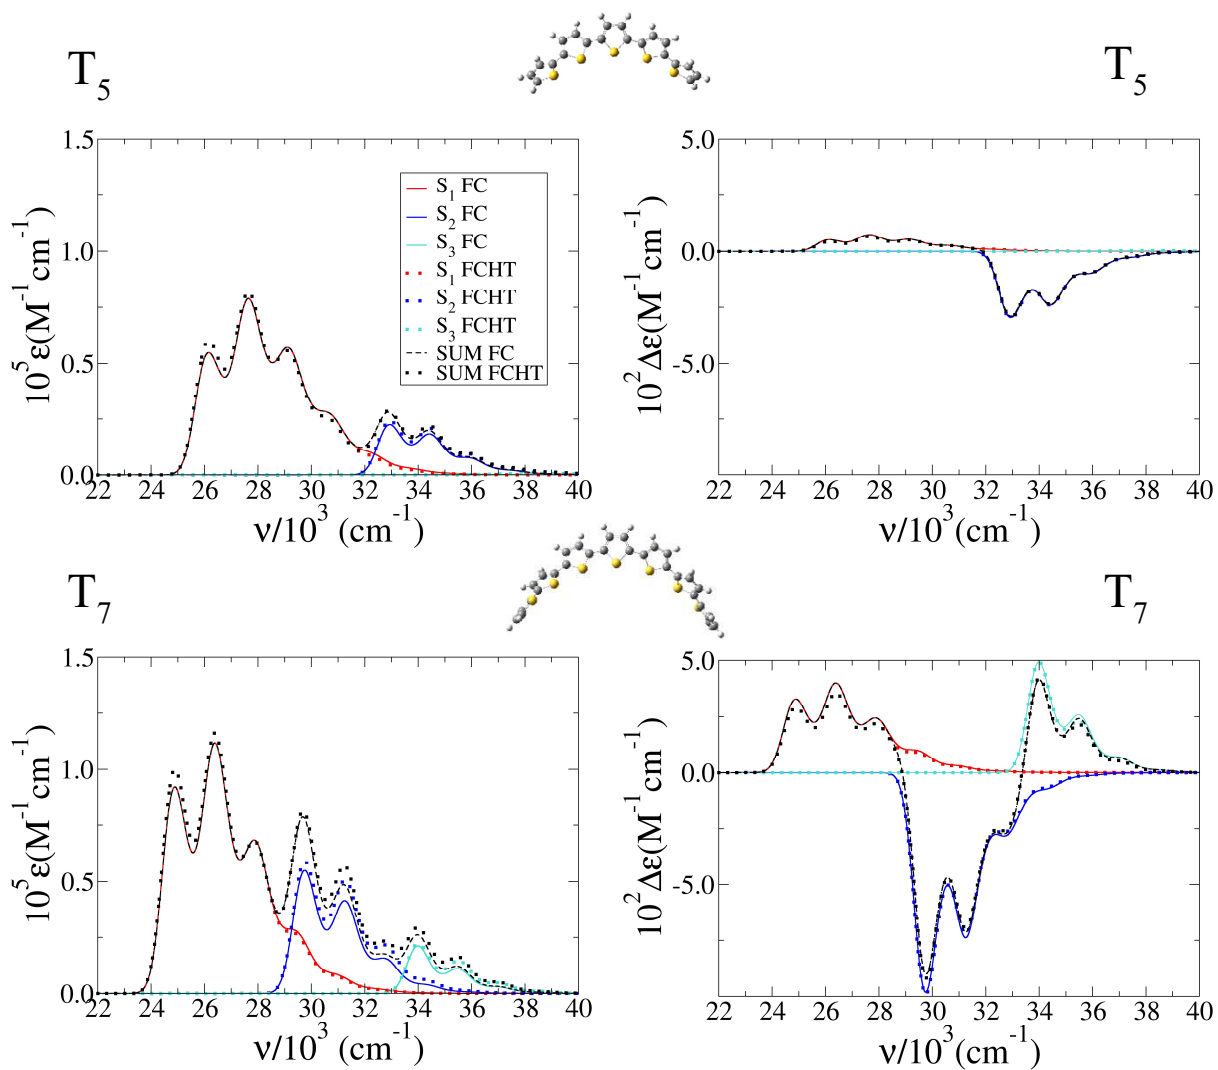

**Figure S12.** FC and FCHT absorption (left) and ECD (right) spectra computed for the *class I* structure of  $T_5$  and  $T_7$  transoid twisted ribbons at 0K and broadened with a Gaussian with HWHM=450  $\text{cm}^{-1}$ . Inter-ring torsion angles are considered frozen during the transition.

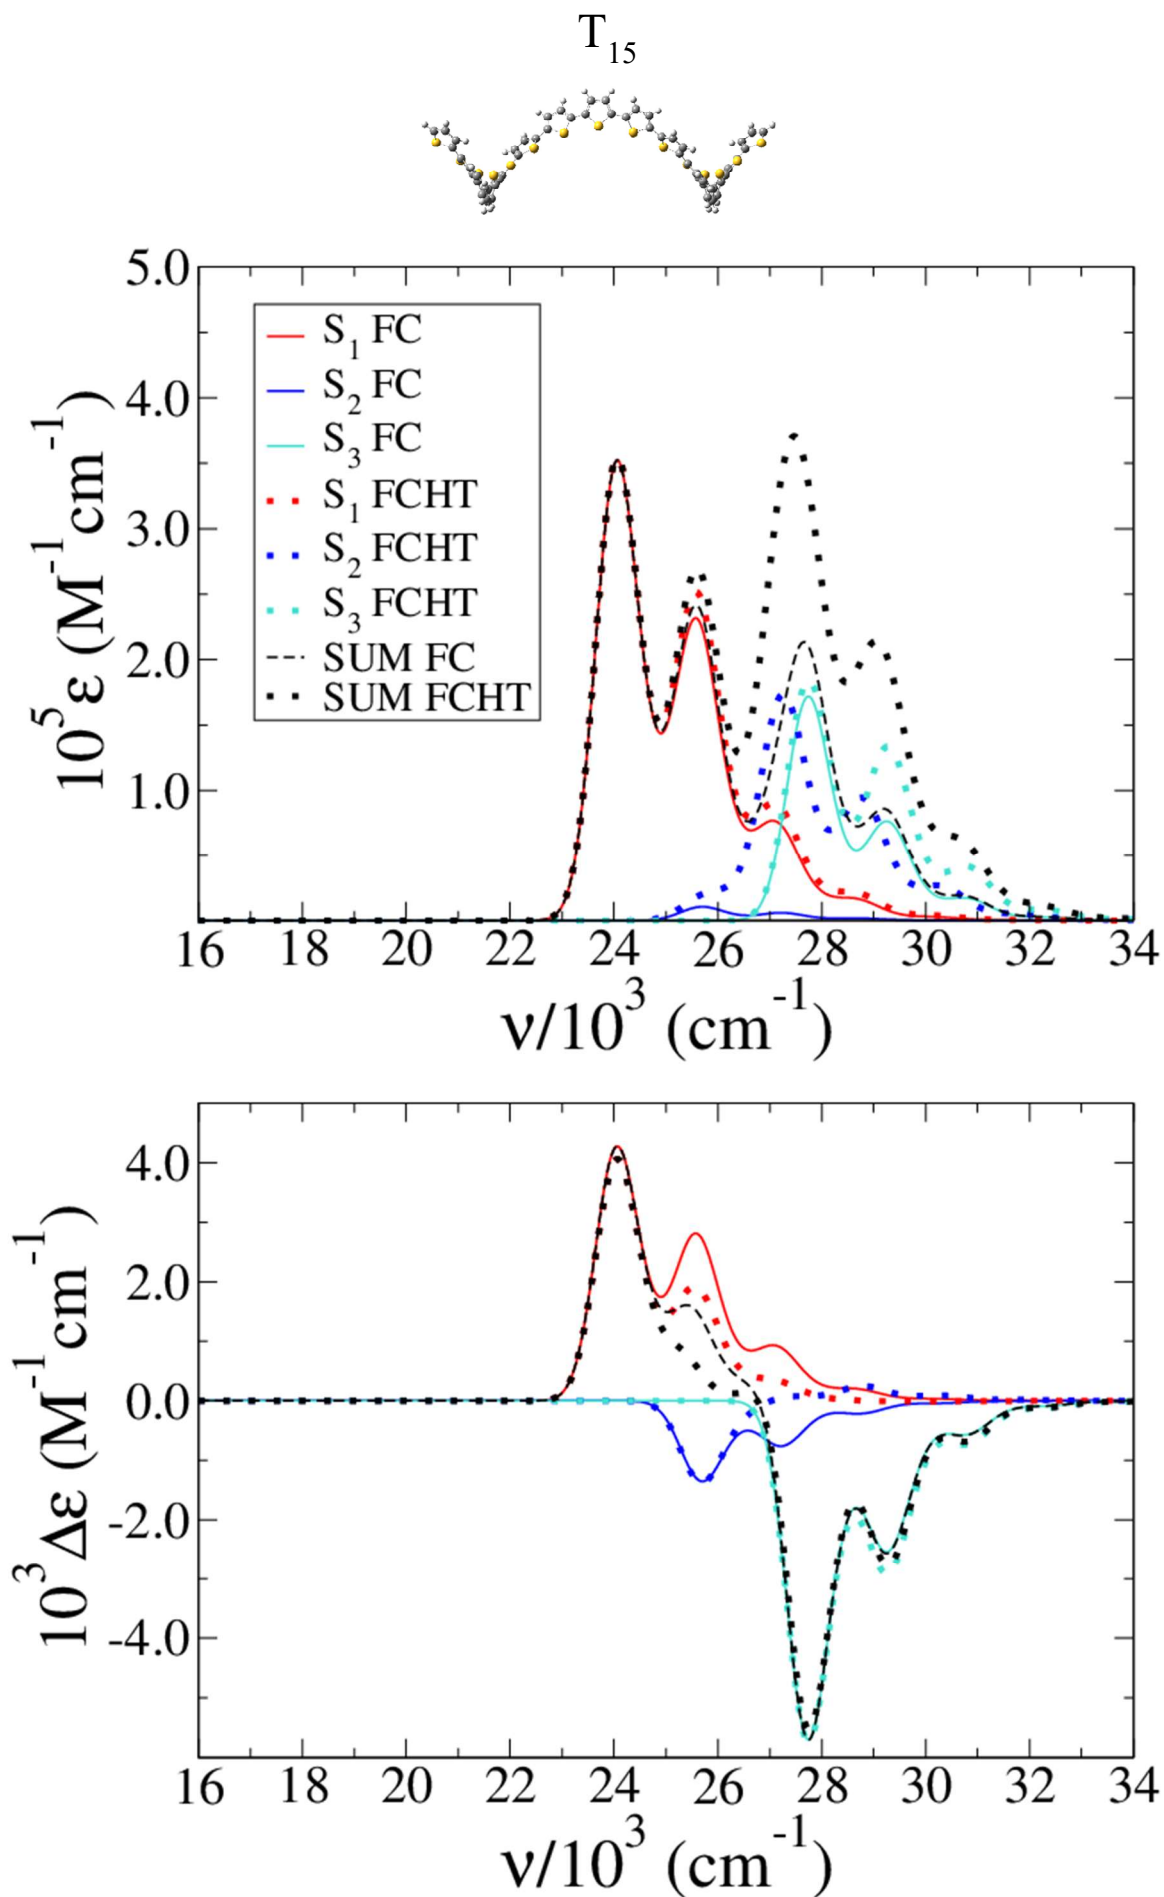

**Figure S13.** FC and FCHT absorption (top) and ECD (bottom) spectra computed for the *class I* structure of  $T_{15}$  cisoid helix at 0K and broadened with a Gaussian with HWHM=450  $\text{cm}^{-1}$ . Inter-ring torsion angles are considered frozen during the transition.

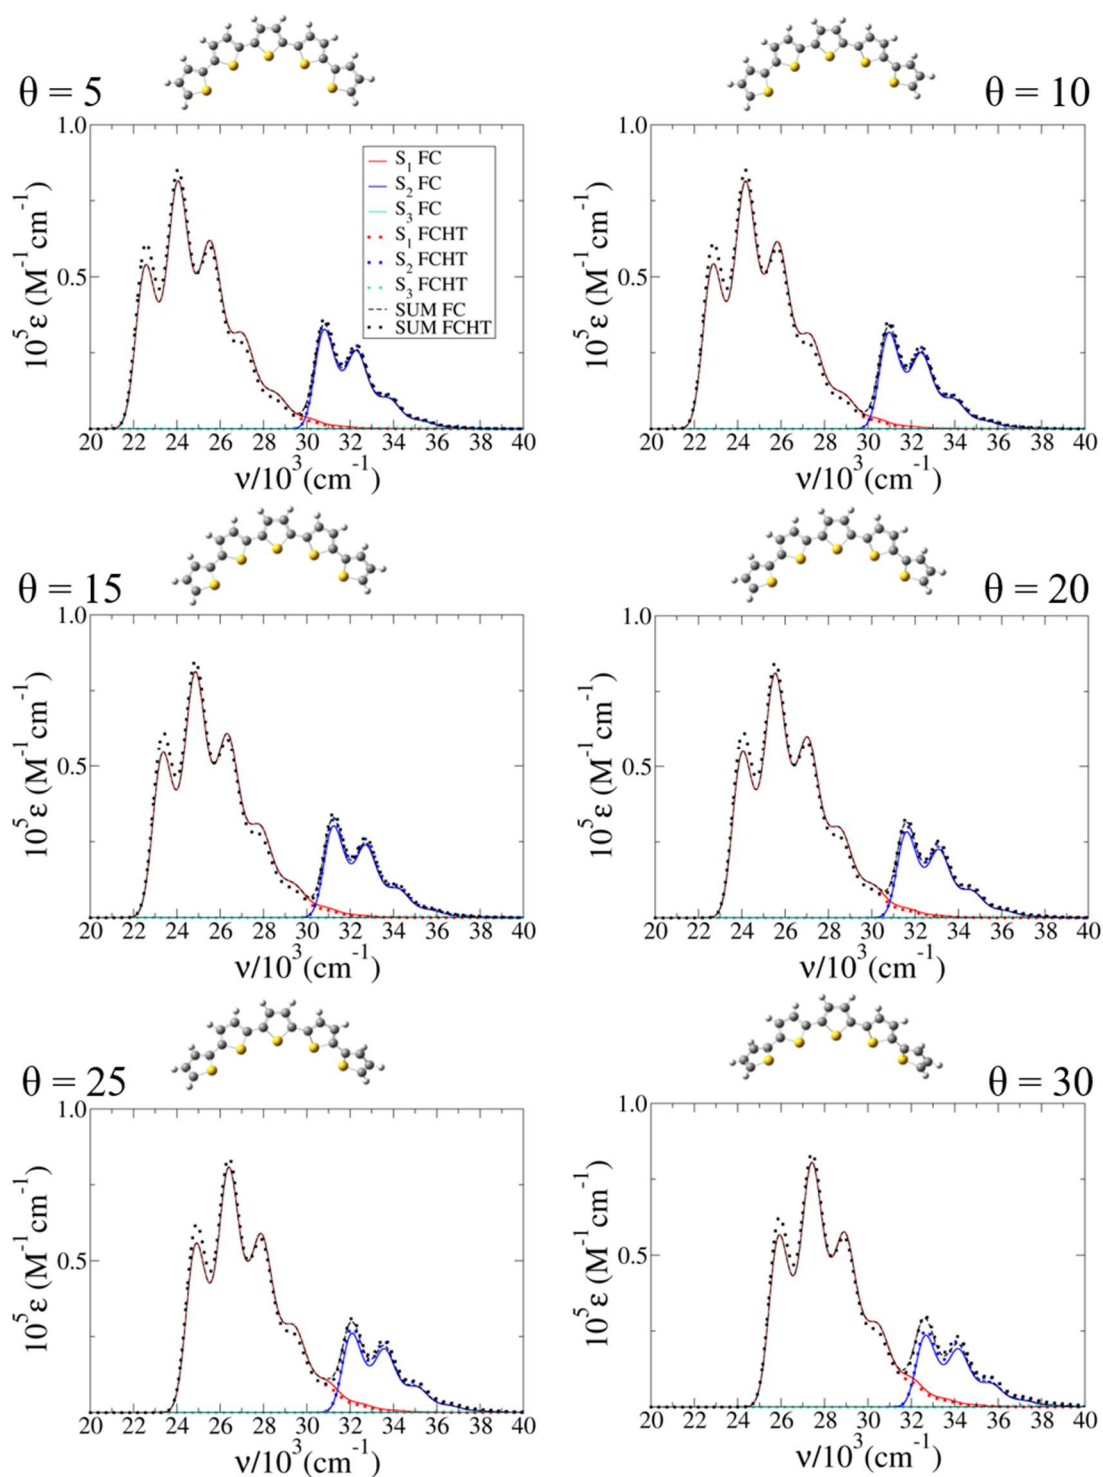

**Figure S14.** FC and FCHT contribution of S1, S2 and S3 to the absorption spectra computed for the *class II* structure of  $T_5$  cisoid helices at 0K and broadened with a Gaussian with HWHM=450  $\text{cm}^{-1}$  at different torsion angles (considered frozen during the transition).

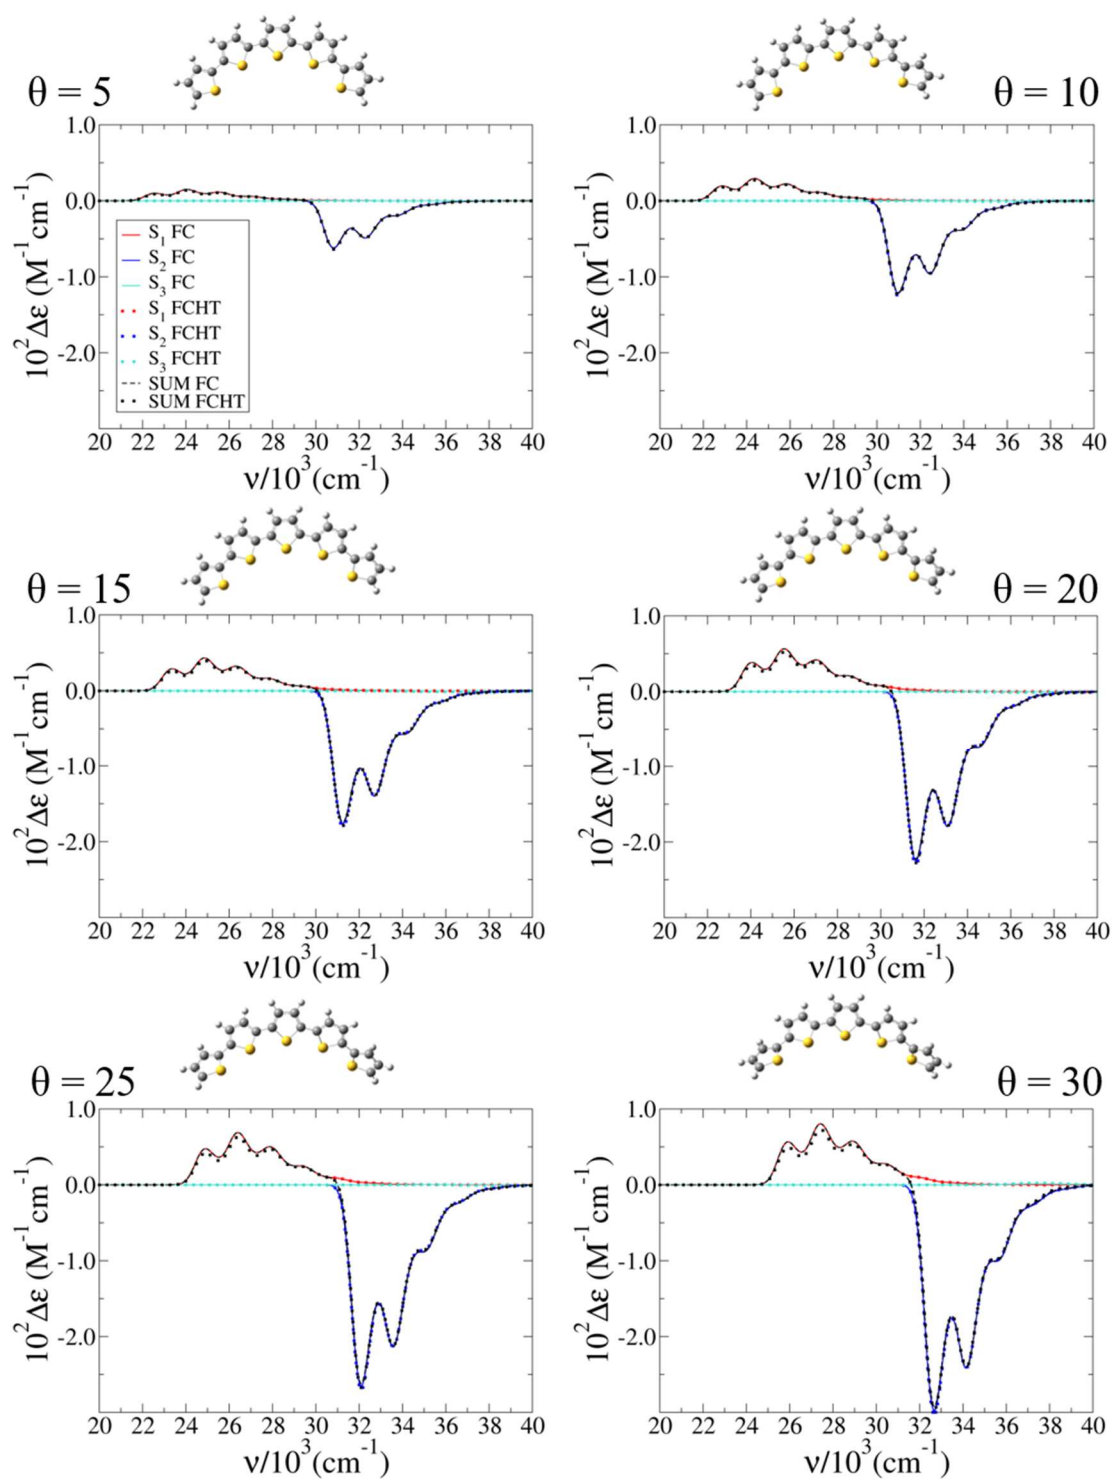

**Figure S15.** FC and FCHT contribution of S1, S2 and S3 to the ECD spectra computed for the *class II* structure of T<sub>5</sub> cisoid helices at 0K and broadened with a Gaussian with HWHM=450 cm<sup>-1</sup> at different torsion angles (considered frozen during the transition).

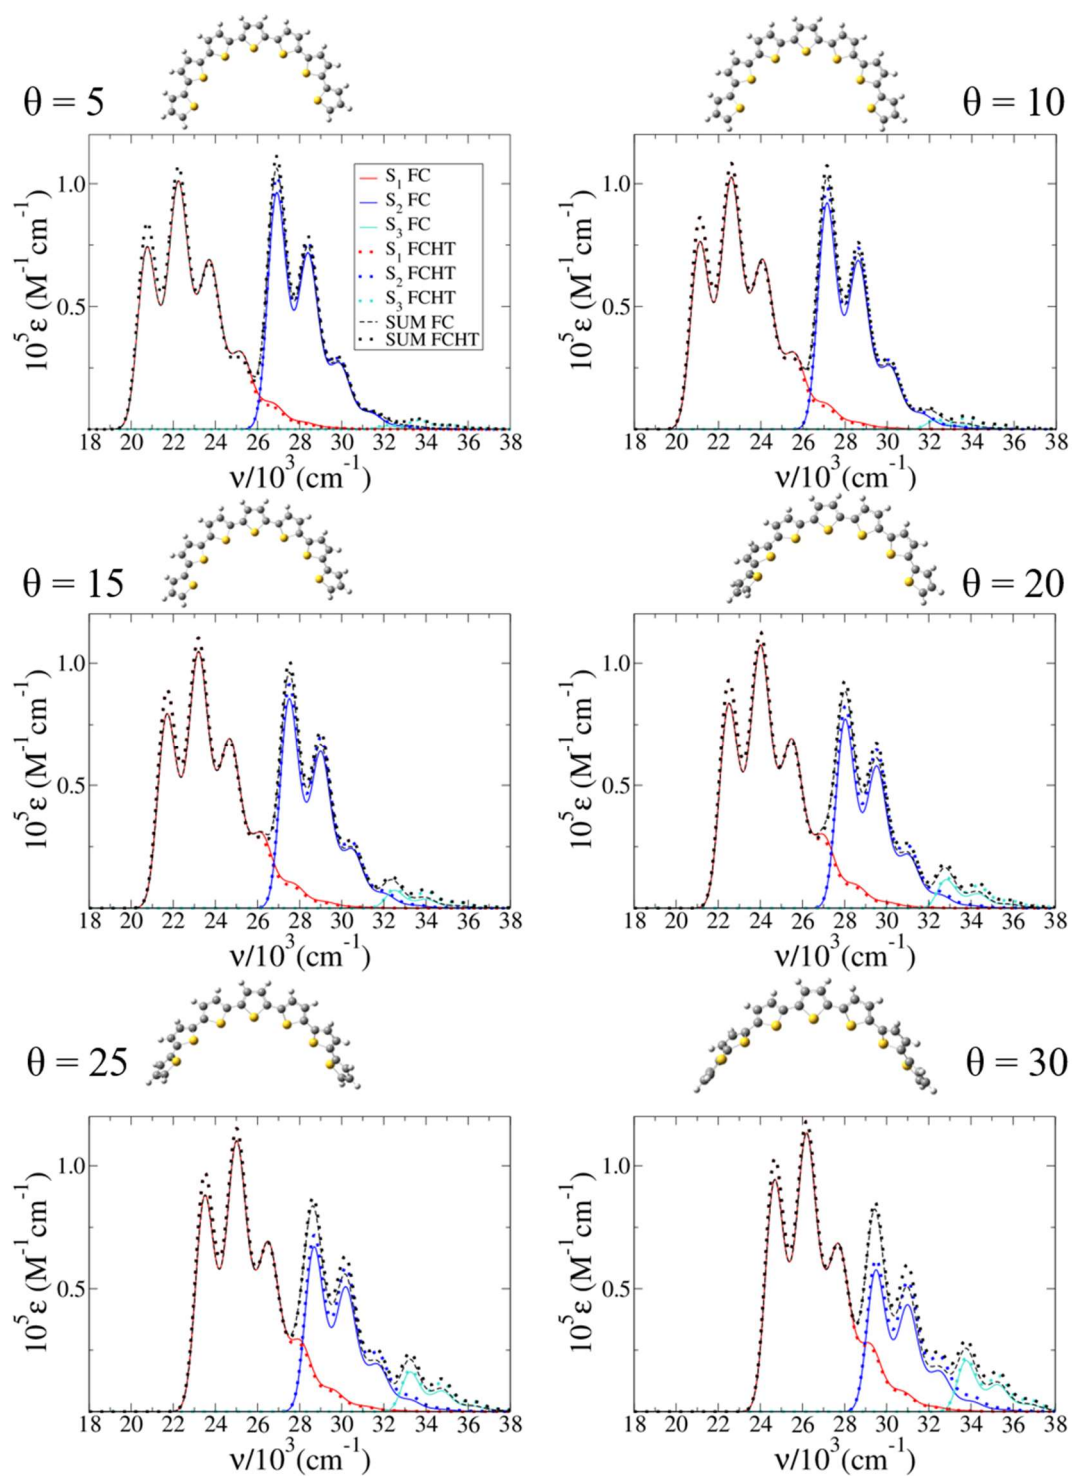

**Figure S16.** FC and FCHT contribution of S1, S2 and S3 to the absorption spectra computed for the *class II* structure of T<sub>7</sub> cisoid helices at 0K and broadened with a Gaussian with HWHM=450 cm<sup>-1</sup> at different torsion angles (considered frozen during the transition).

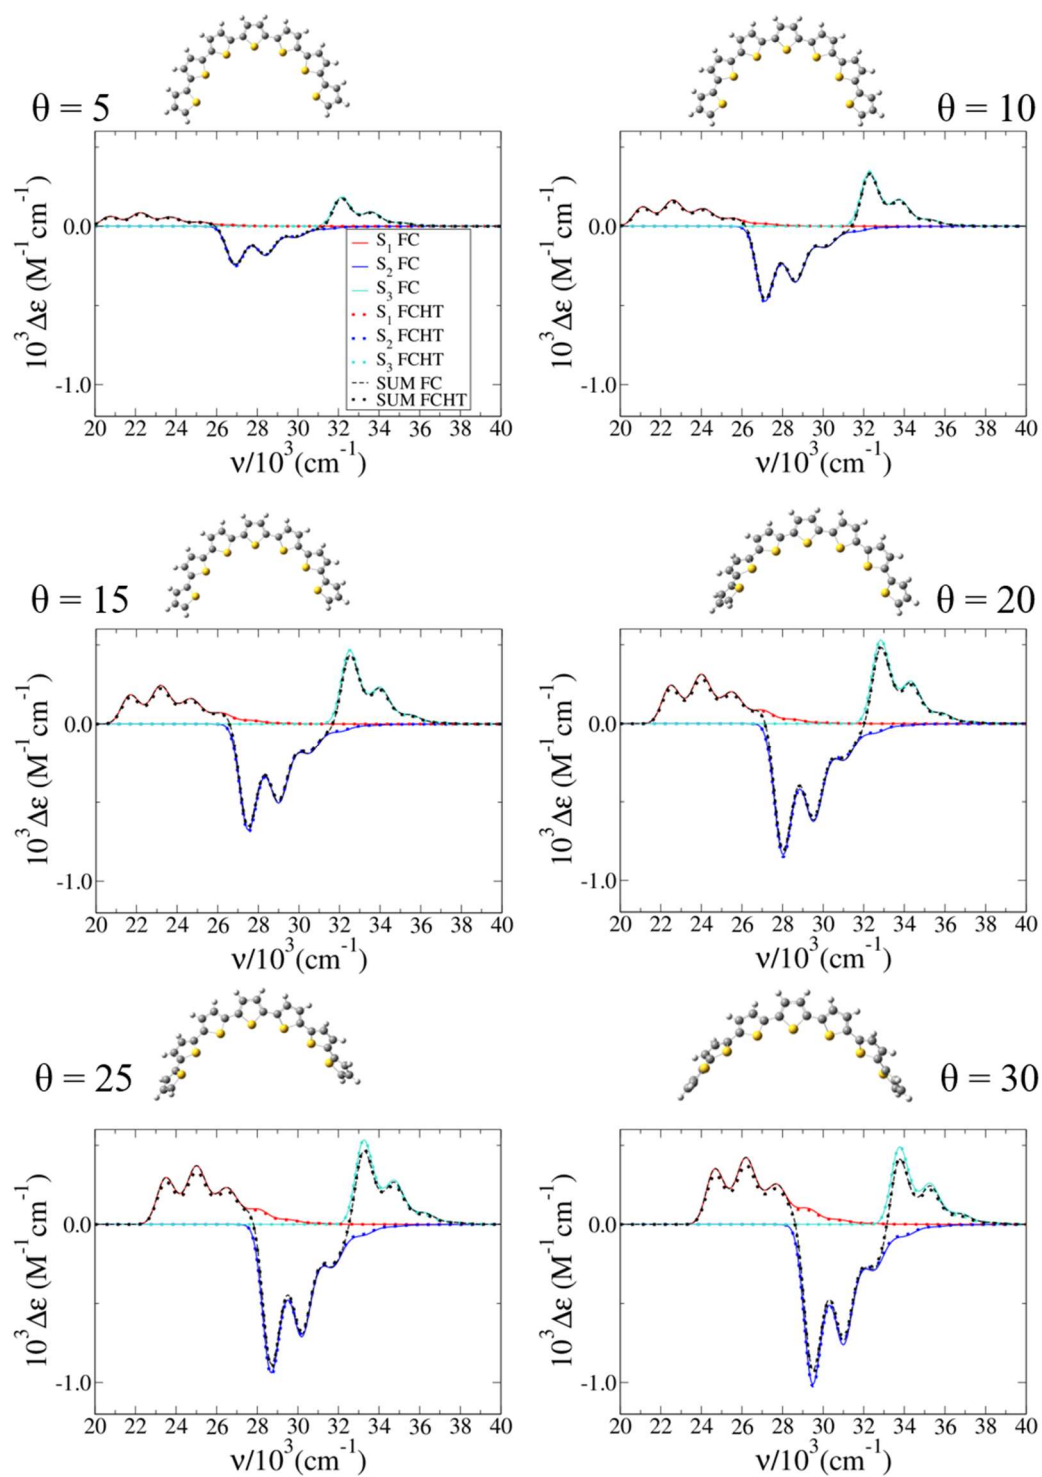

**Figure S17.** FC and FCHT contribution of S1, S2 and S3 to the ECD spectra computed for the *class II* structure of T<sub>7</sub> cisoid helices at 0K and broadened with a Gaussian with HWHM=450 cm<sup>-1</sup> at different torsion angles (considered frozen during the transition).



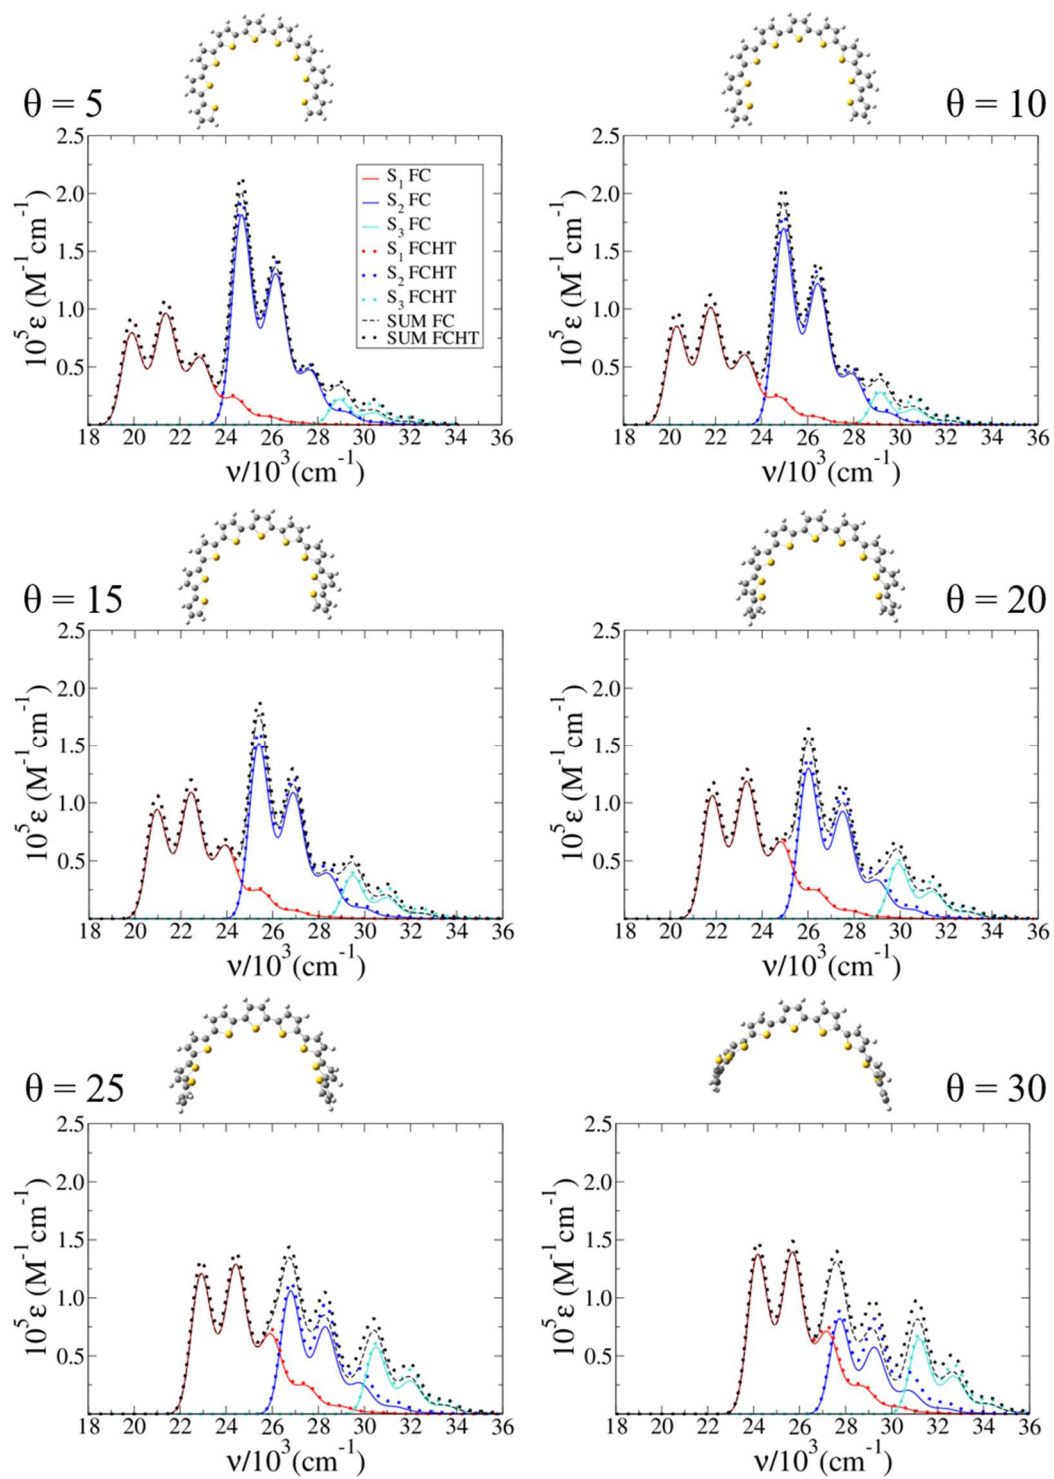

**Figure S18.** FC and FCHT contribution of S1, S2 and S3 to the absorption spectra computed for the *class II* structure of T<sub>9</sub> cisoid helices at 0K and broadened with a Gaussian with HWHM=450 cm<sup>-1</sup> at different torsion angles (considered frozen during the transition).



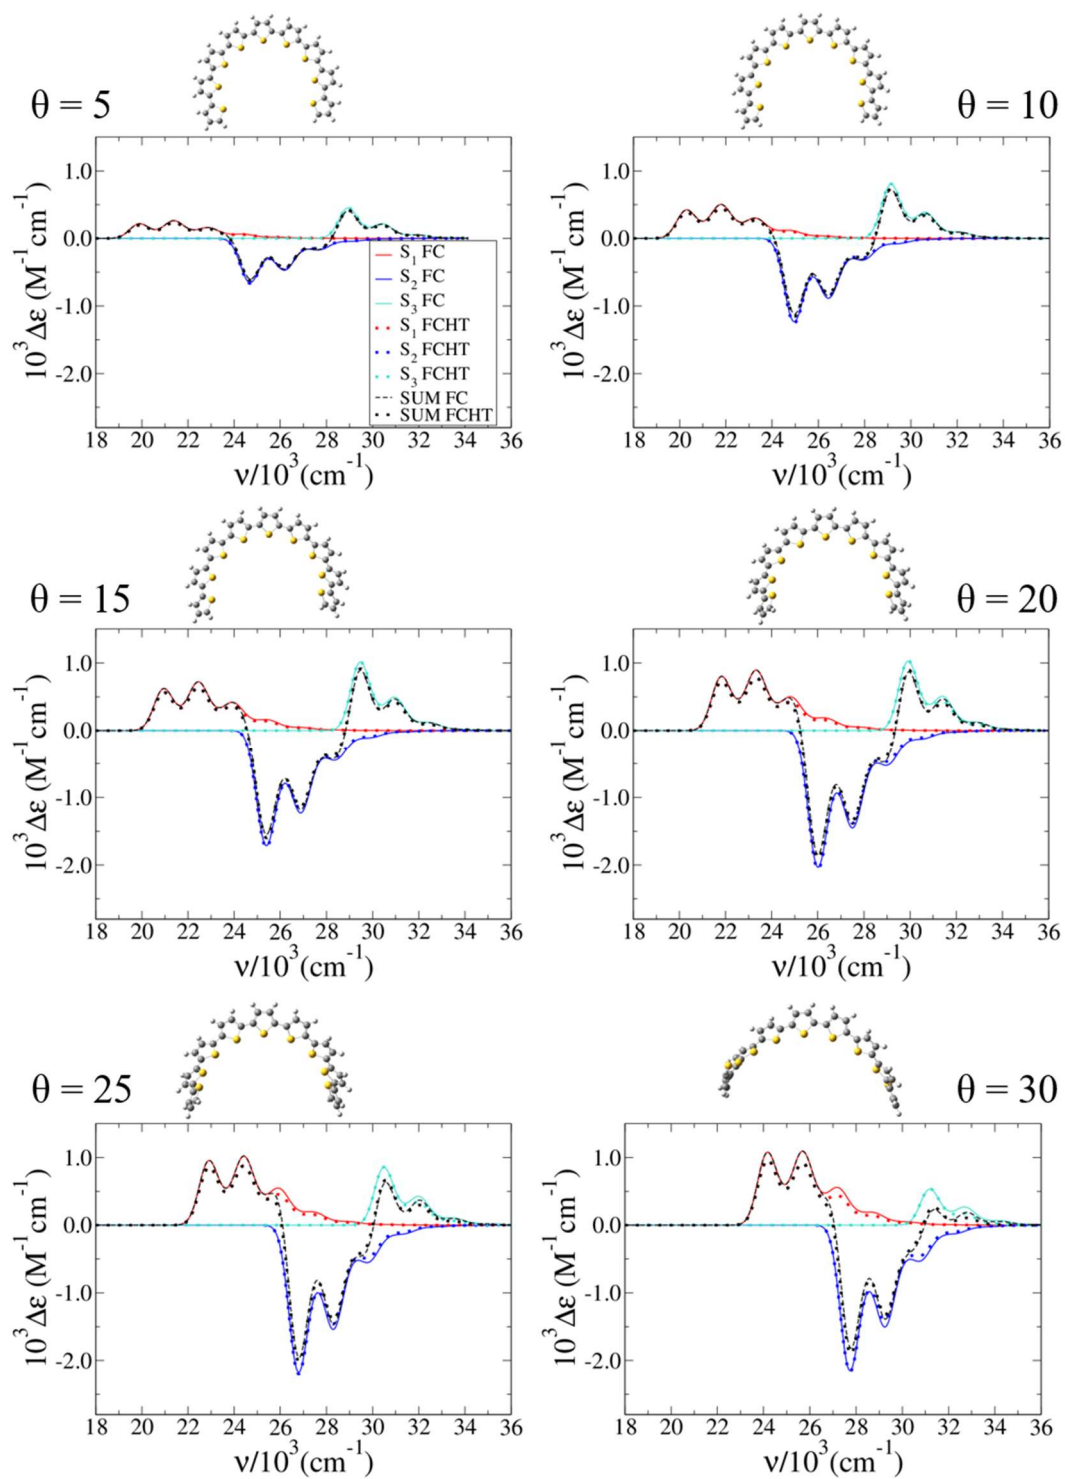

**Figure S19.** FC and FCHT contribution of S1, S2 and S3 to the ECD spectra computed for the *class II* structure of T<sub>9</sub> cisoid helices at 0K and broadened with a Gaussian with HWHM=450 cm<sup>-1</sup> at different torsion angles (considered frozen during the transition).

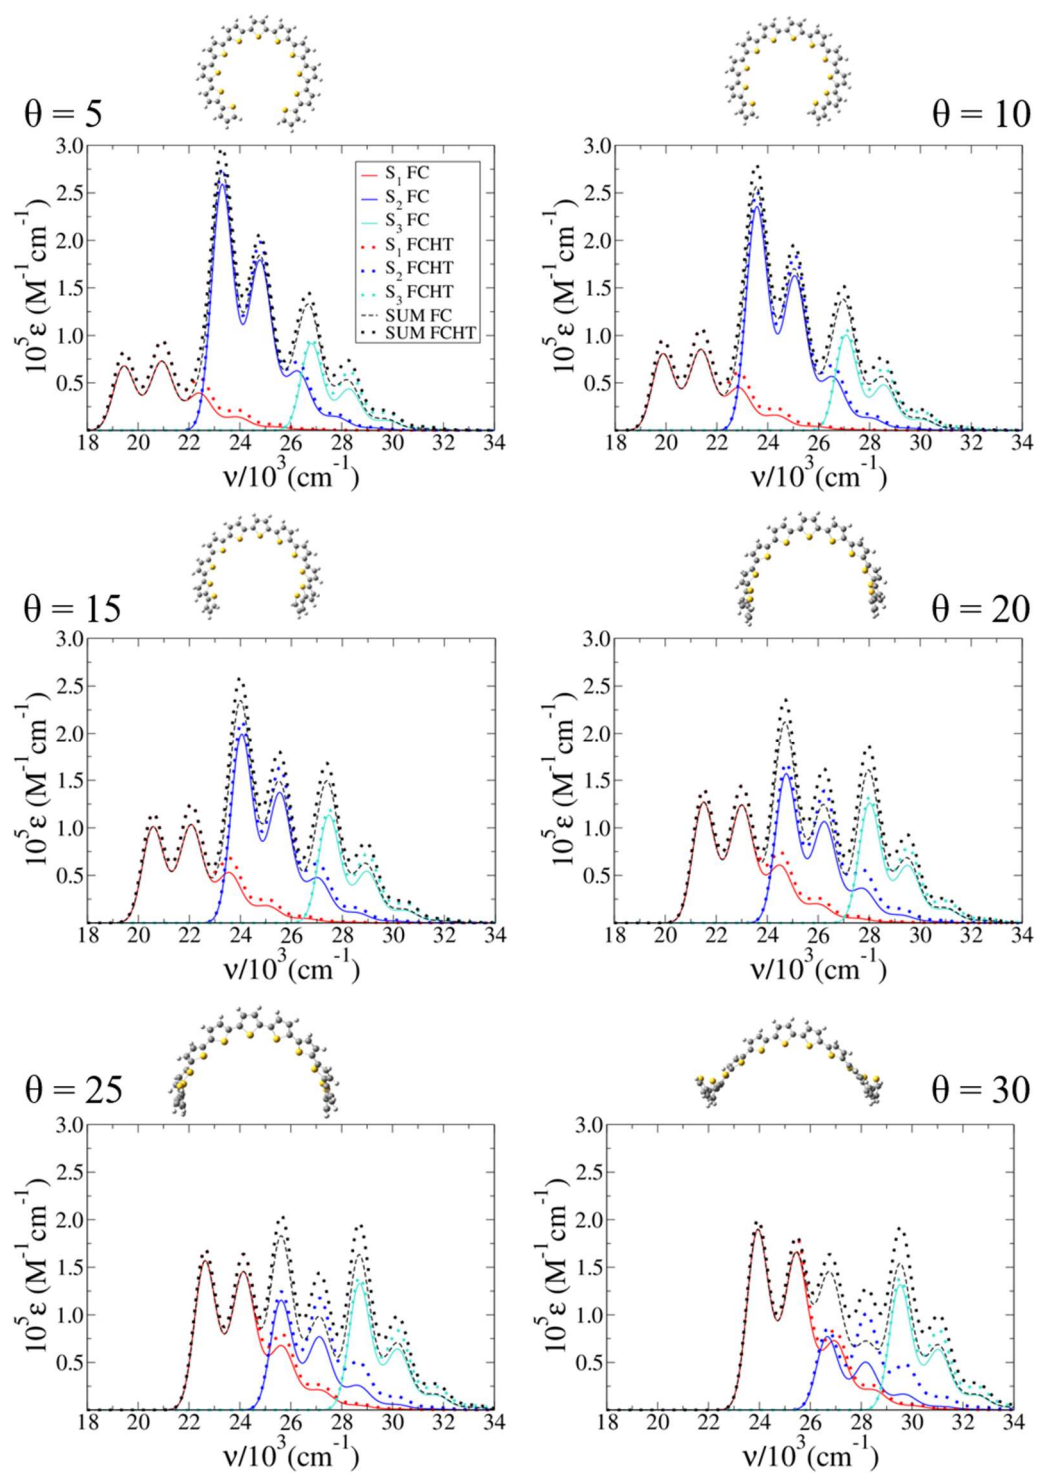

**Figure S20.** FC and FCHT contribution of S1, S2 and S3 to the absorption spectra computed for the *class II* structure of T<sub>11</sub> cisoid helices at 0K and broadened with a Gaussian with HWHM=450 cm<sup>-1</sup> at different torsion angles (considered frozen during the transition).

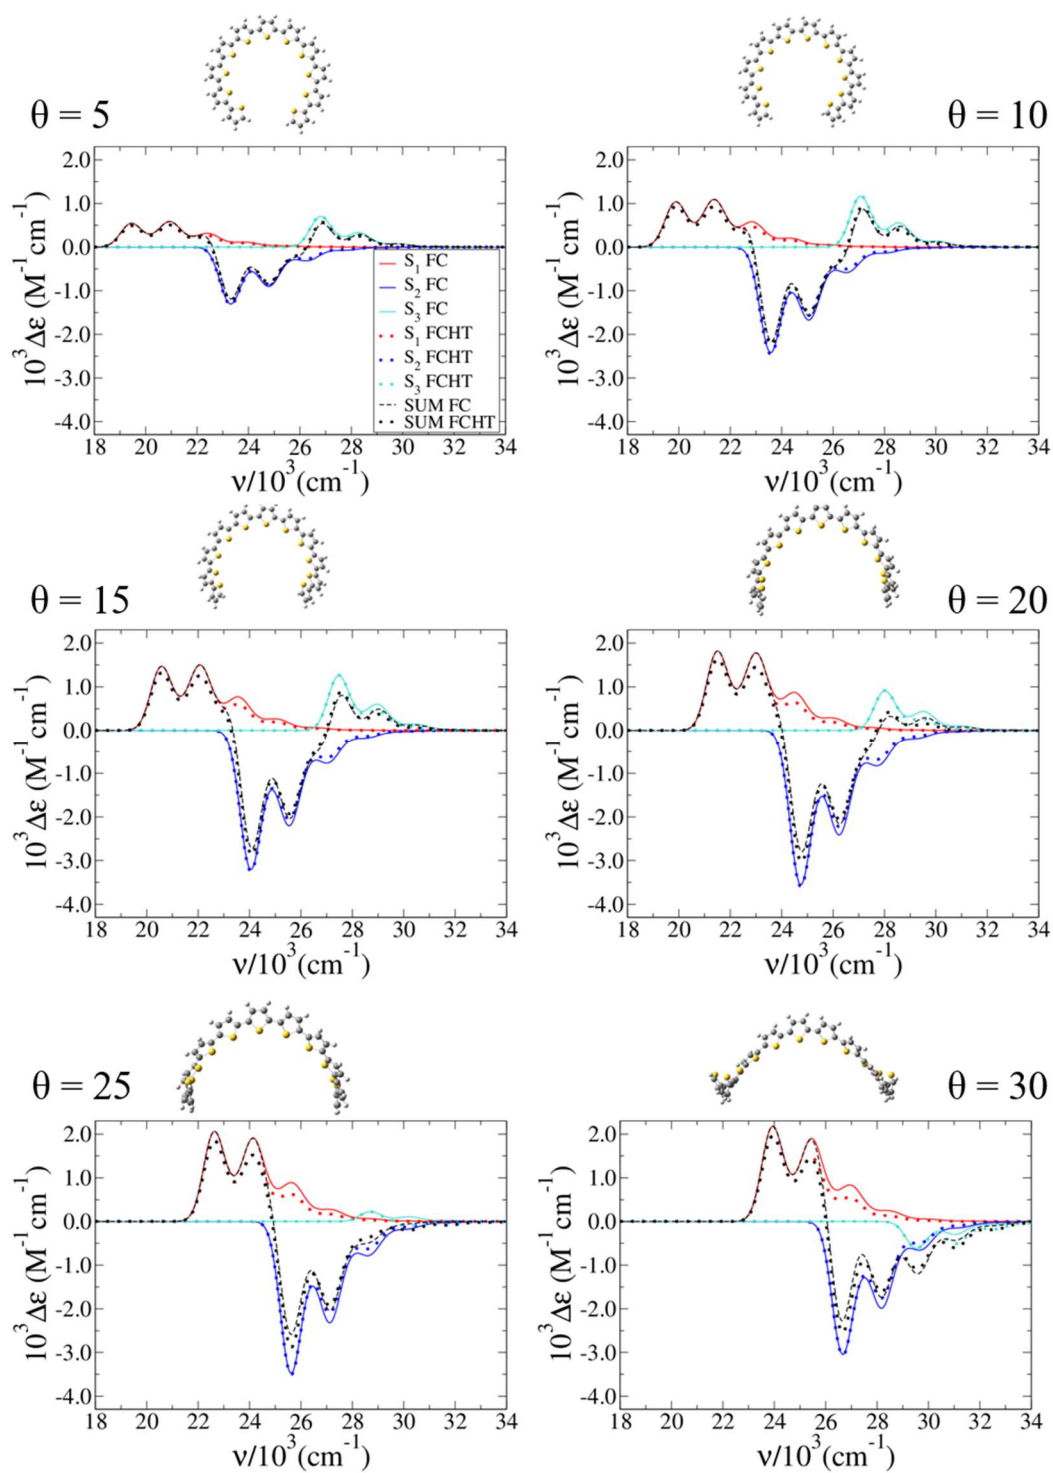

**Figure S21.** FC and FCHT contribution of S1, S2 and S3 to the ECD spectra computed for the *class II* structure of T<sub>11</sub> cisoid helices at 0K and broadened with a Gaussian with HWHM=450 cm<sup>-1</sup> at different torsion angles (considered frozen during the transition).

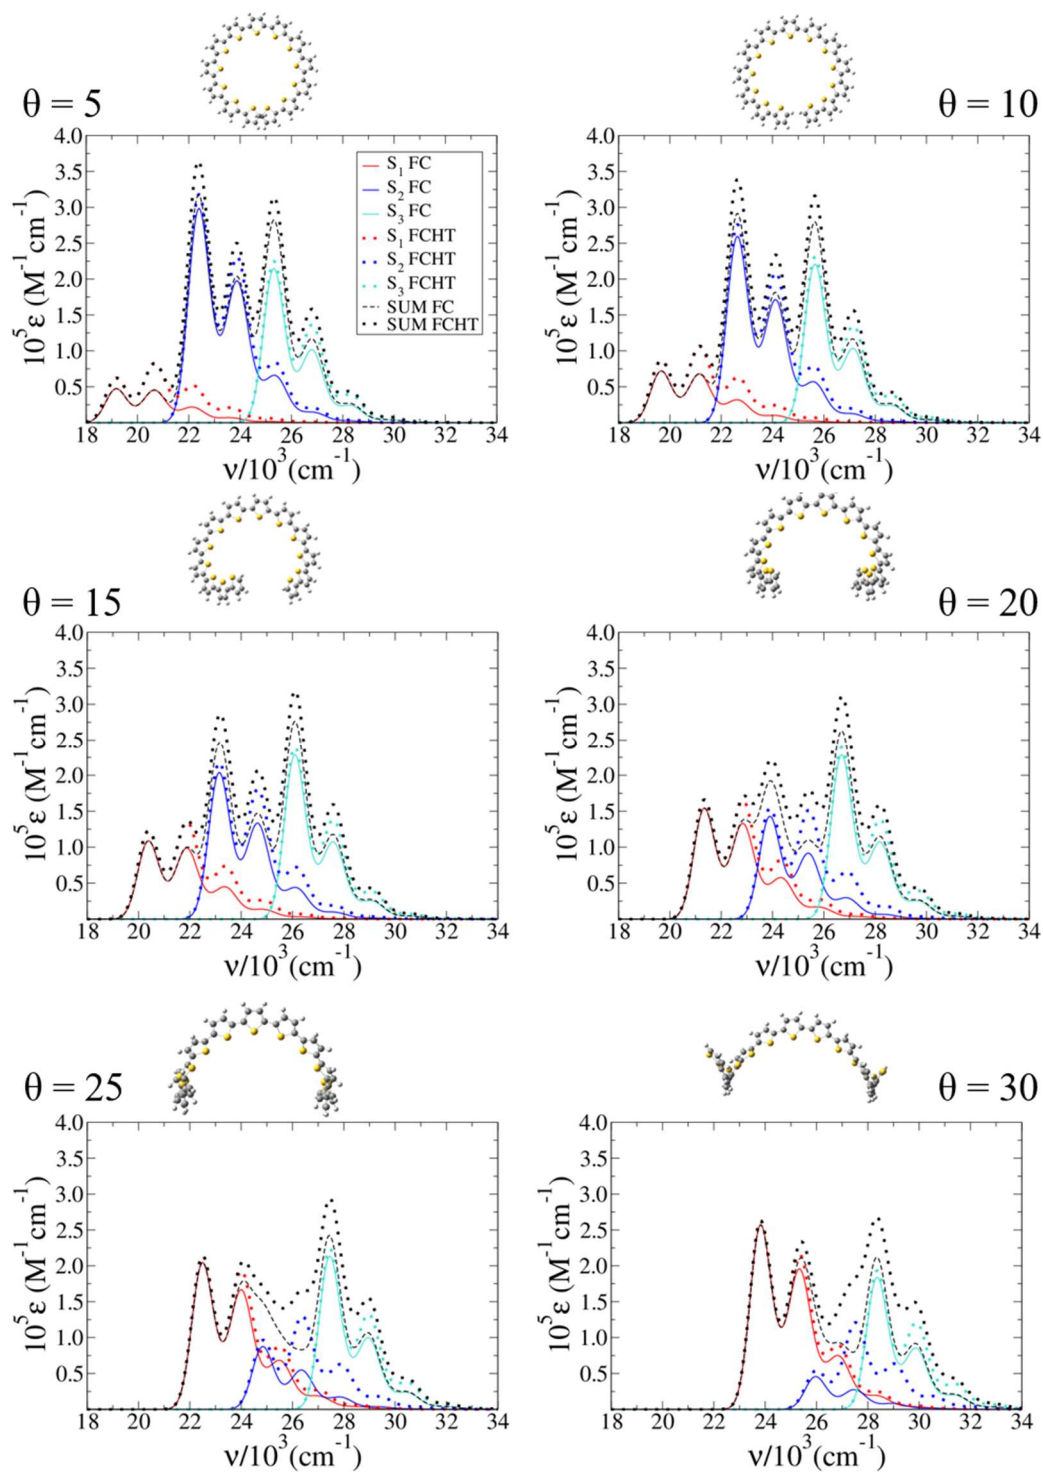

**Figure S22.** FC and FCHT contribution of S1, S2 and S3 to the absorption spectra computed for the *class II* structure of T<sub>13</sub> cisoid helices at 0K and broadened with a Gaussian with HWHM=450 cm<sup>-1</sup> at different torsion angles (considered frozen during the transition).

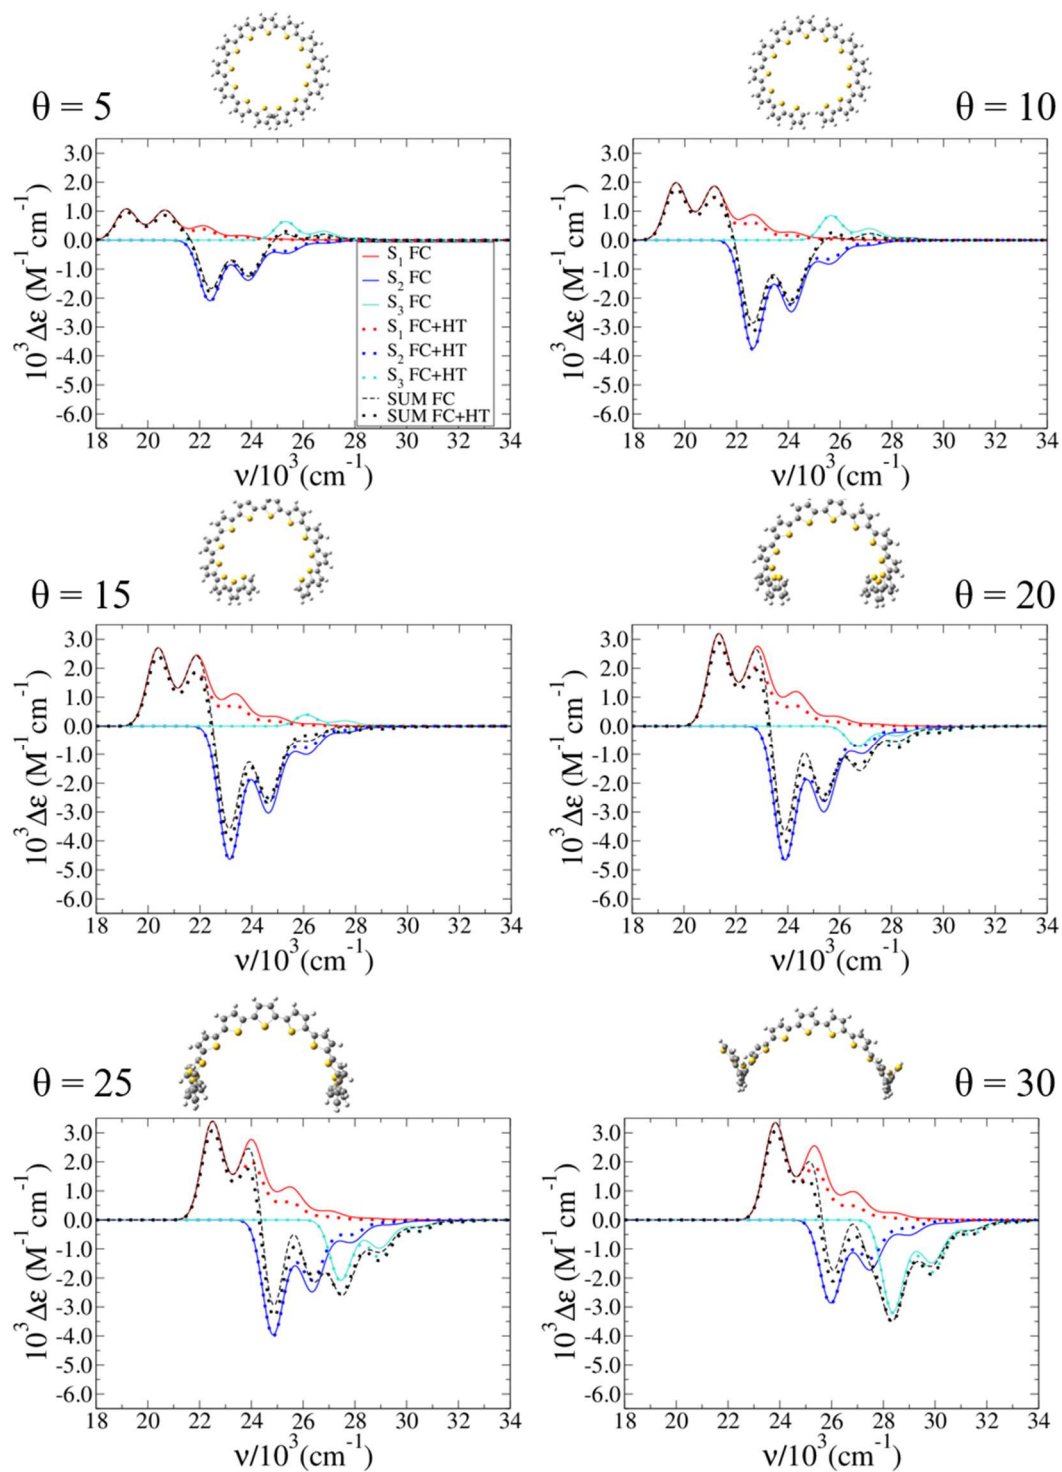

**Figure S23.** FC and FC+HT contribution of S1, S2 and S3 to the ECD spectra computed for the *class II* structure of T<sub>13</sub> cisoid helices at 0K and broadened with a Gaussian with HWHM=450 cm<sup>-1</sup> at different torsion angles (considered frozen during the transition).



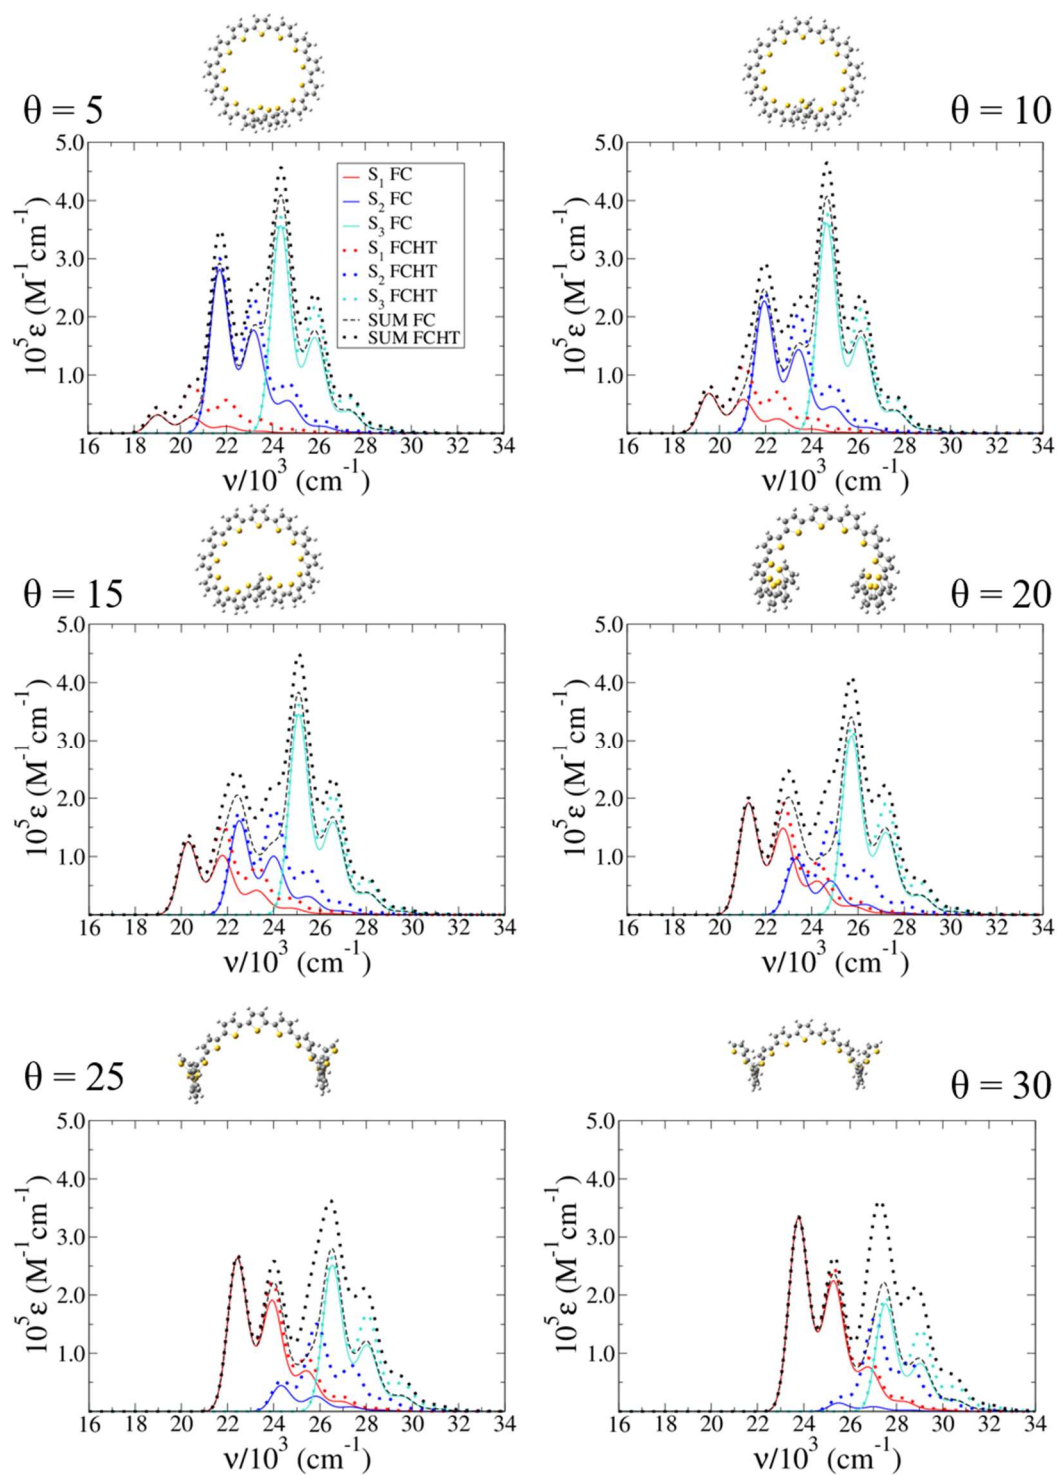

**Figure S24.** FC and FCHT contribution of S1, S2 and S3 to the absorption spectra computed for the *class II* structure of T<sub>15</sub> cisoid helices at 0K and broadened with a Gaussian with HWHM=450 cm<sup>-1</sup> at different torsion angles (considered frozen during the transition).

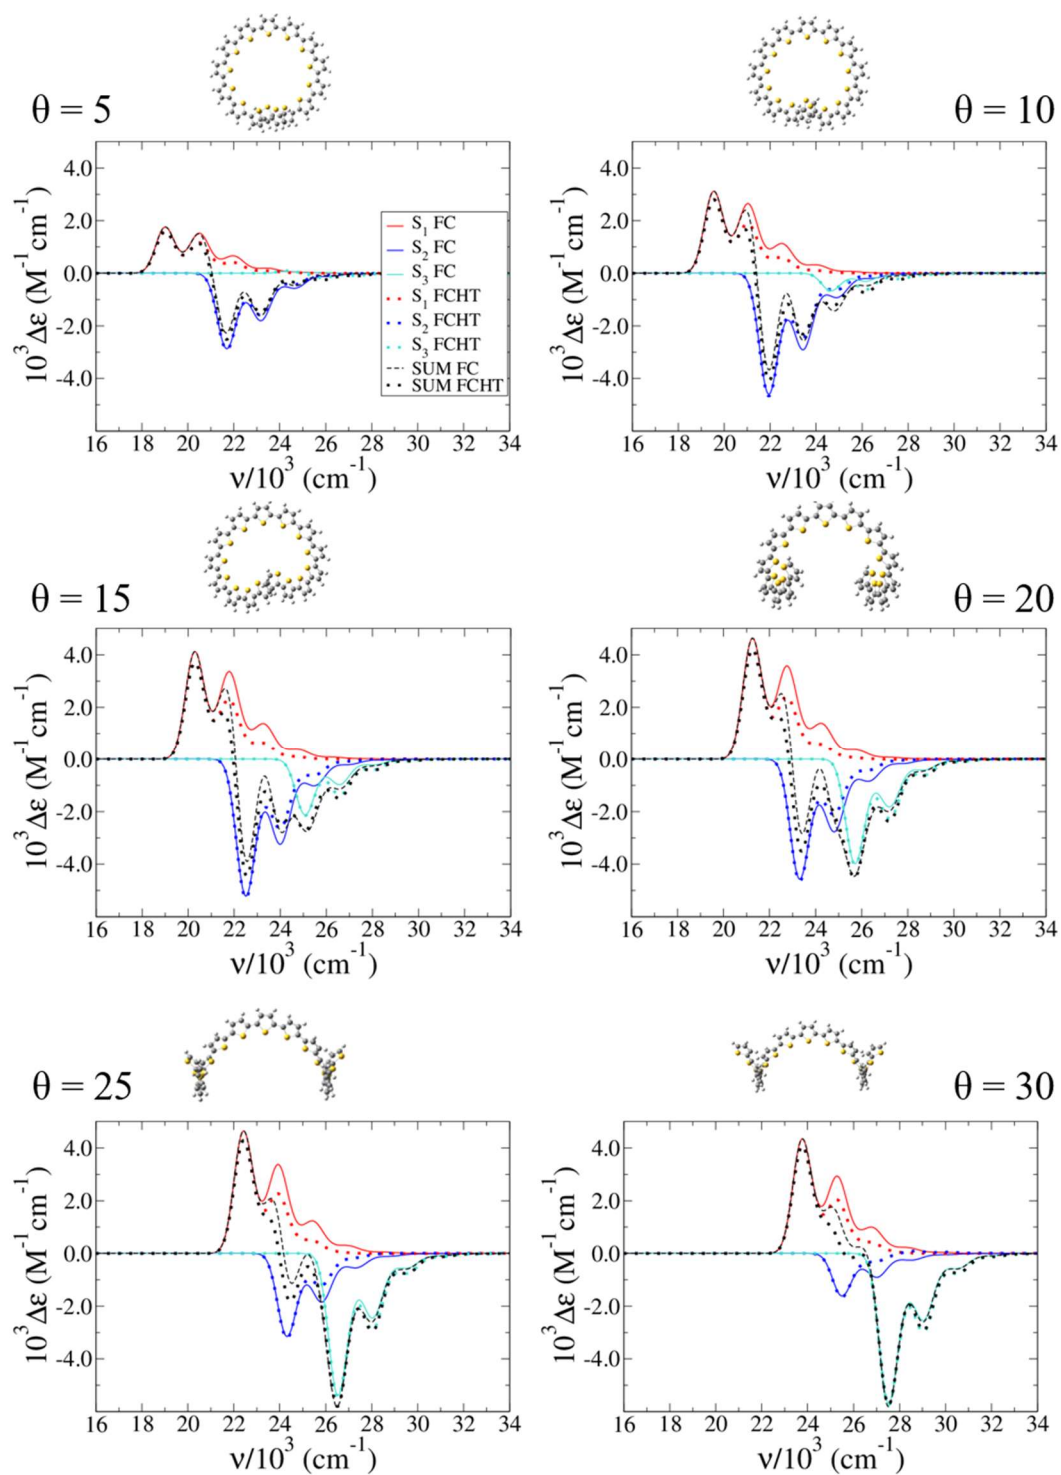

**Figure S25.** FC and FCHT contribution of S1, S2 and S3 to the ECD spectra computed for the *class II* structure of T<sub>15</sub> cisoid helices at 0K and broadened with a Gaussian with HWHM=450 cm<sup>-1</sup> at different torsion angles (considered frozen during the transition).

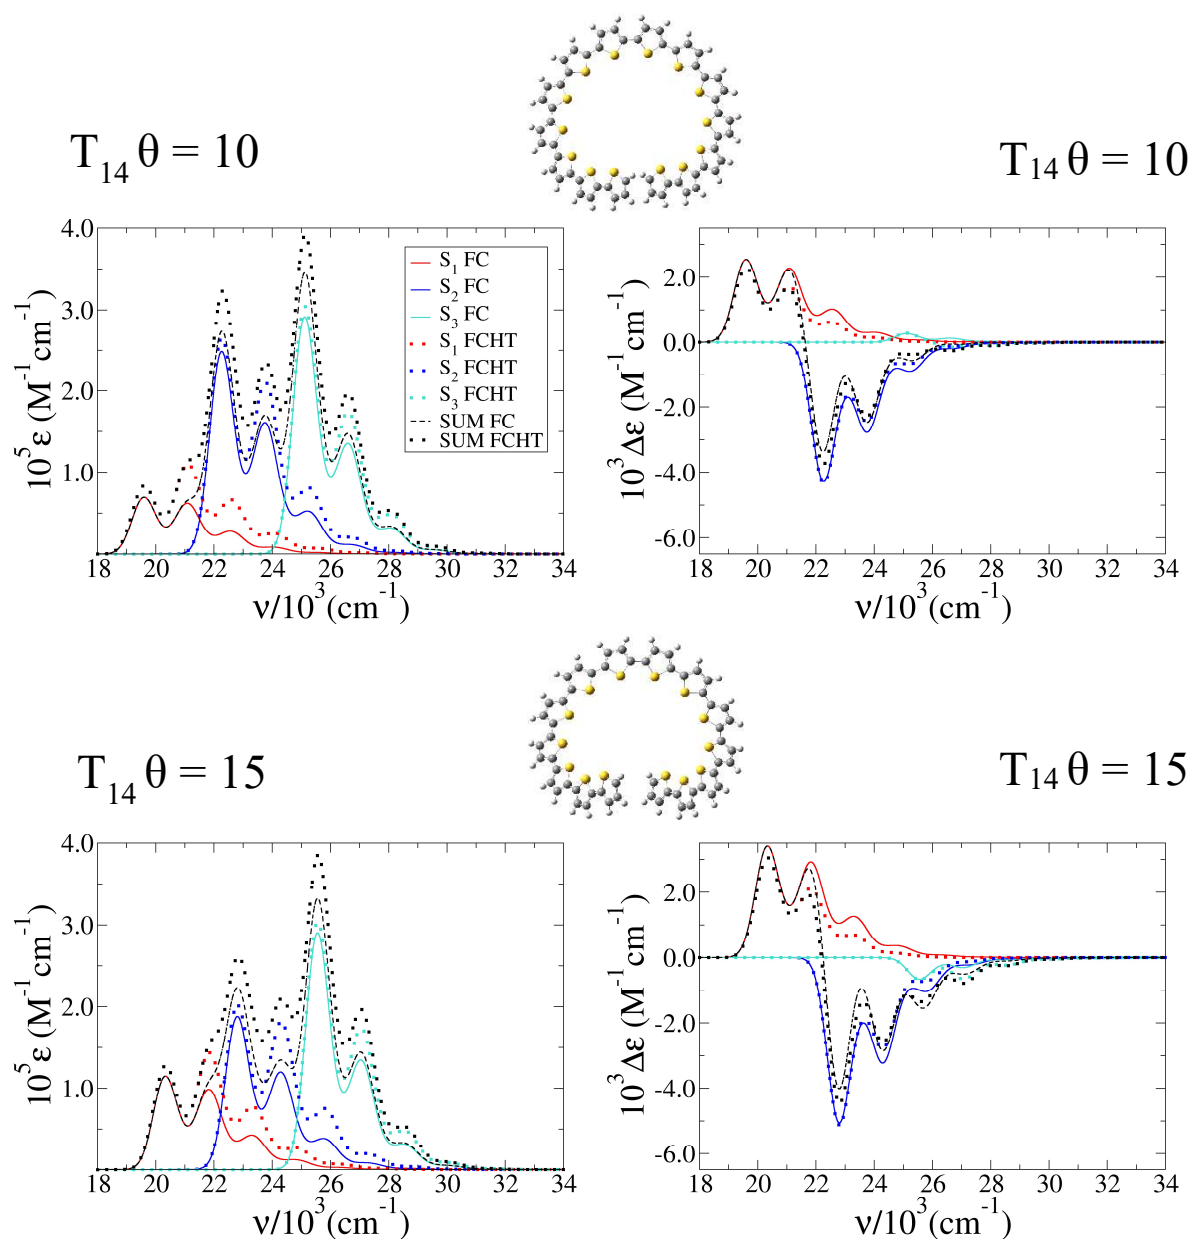

**Figure S26.** FC and FCHT absorption (left) and ECD (right) spectra computed for the *class II* structure of  $T_{14}$  with  $\theta = 10$  (top) and  $\theta = 15$  (bottom) cisoid helices at 0K and broadened with a Gaussian with HWHM=450  $\text{cm}^{-1}$ . Inter-ring torsion angles are considered frozen during the transition.



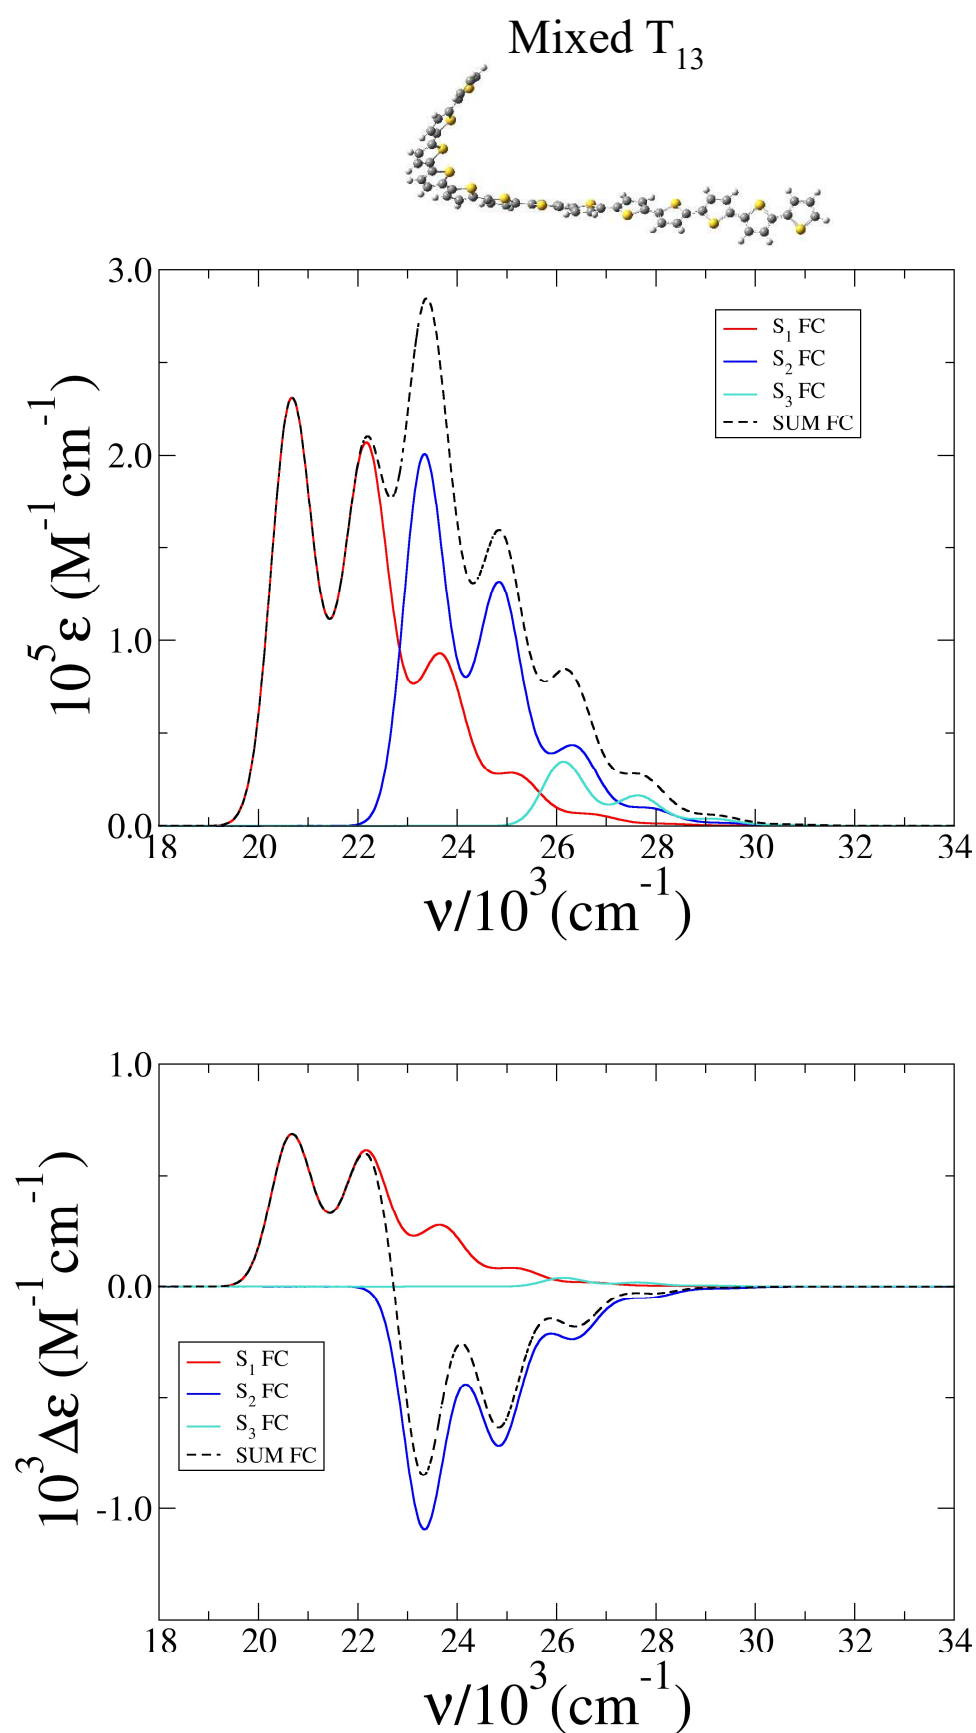

**Figure S27.** FC absorption (top) and ECD (bottom) spectra computed for the *class II* structure of mixed  $T_{13}$  helix at  $\theta=15^\circ$ , 0K and broadened with a Gaussian with HWHM=450  $\text{cm}^{-1}$ . Inter-ring torsion angles are considered frozen during the transition.

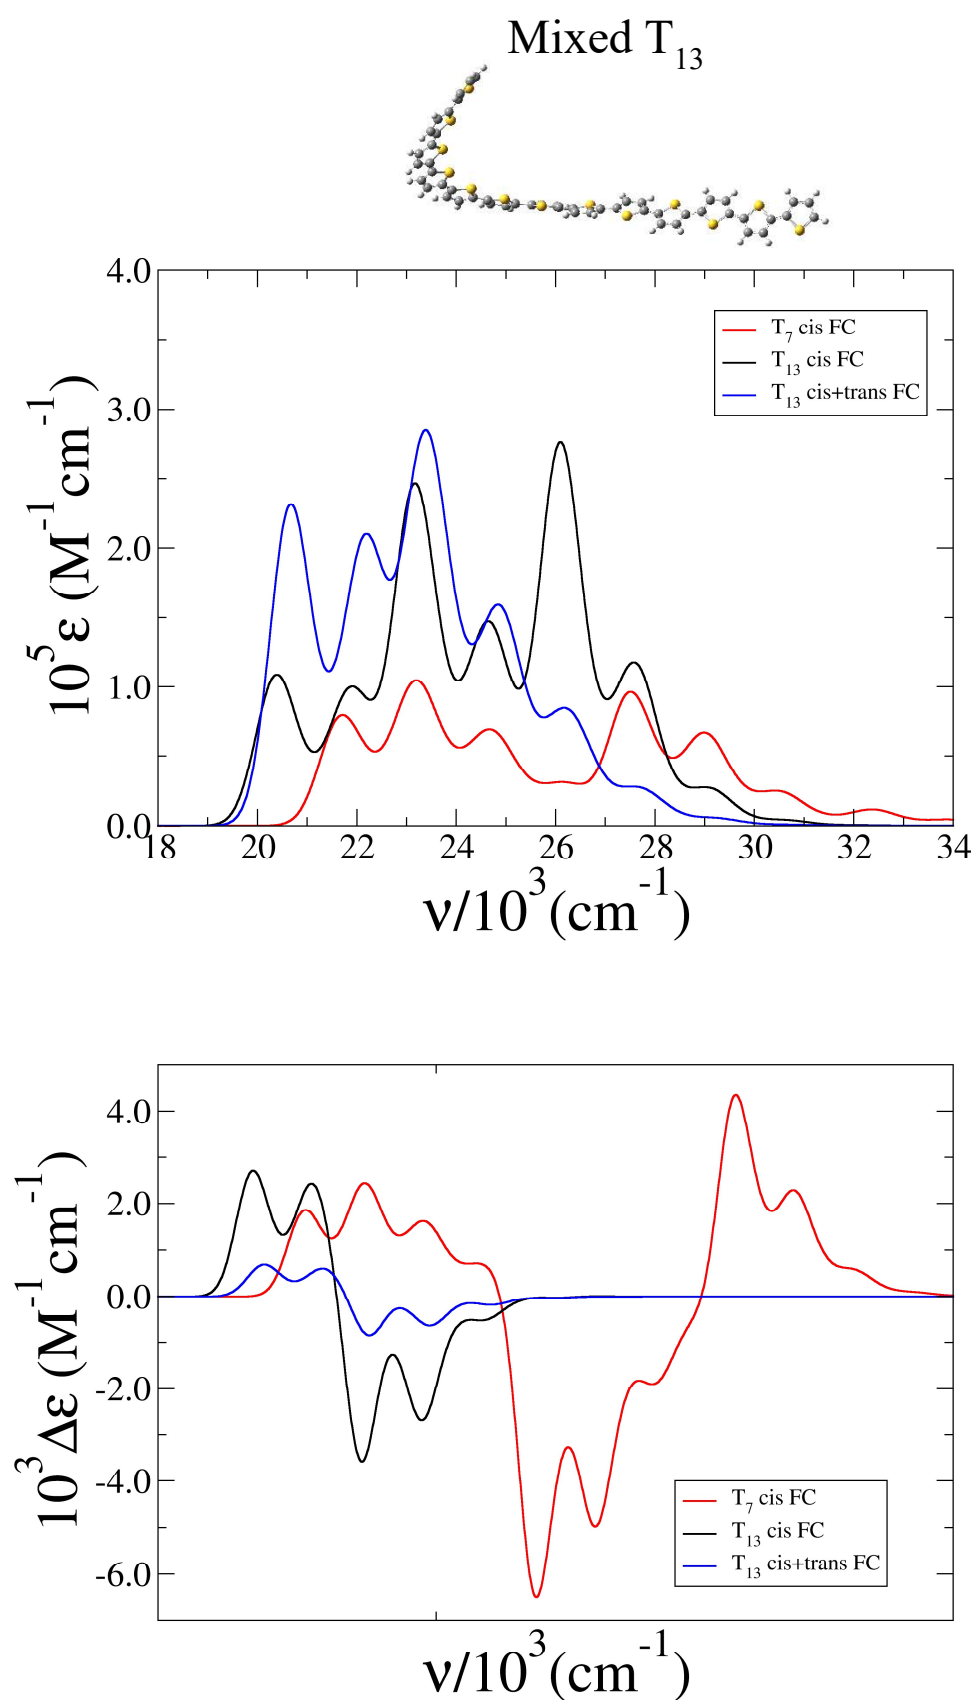

**Figure S28.** FC absorption (top) and ECD (bottom) spectra computed for the *class II* structures of cisoid T<sub>7</sub>, cisoid T<sub>13</sub> and mixed T<sub>13</sub> helix. All were computed at  $\theta=15^\circ$ , 0K and broadened with a Gaussian with HWHM=450 cm<sup>-1</sup>. Inter-ring torsion angles are considered frozen during the transition.

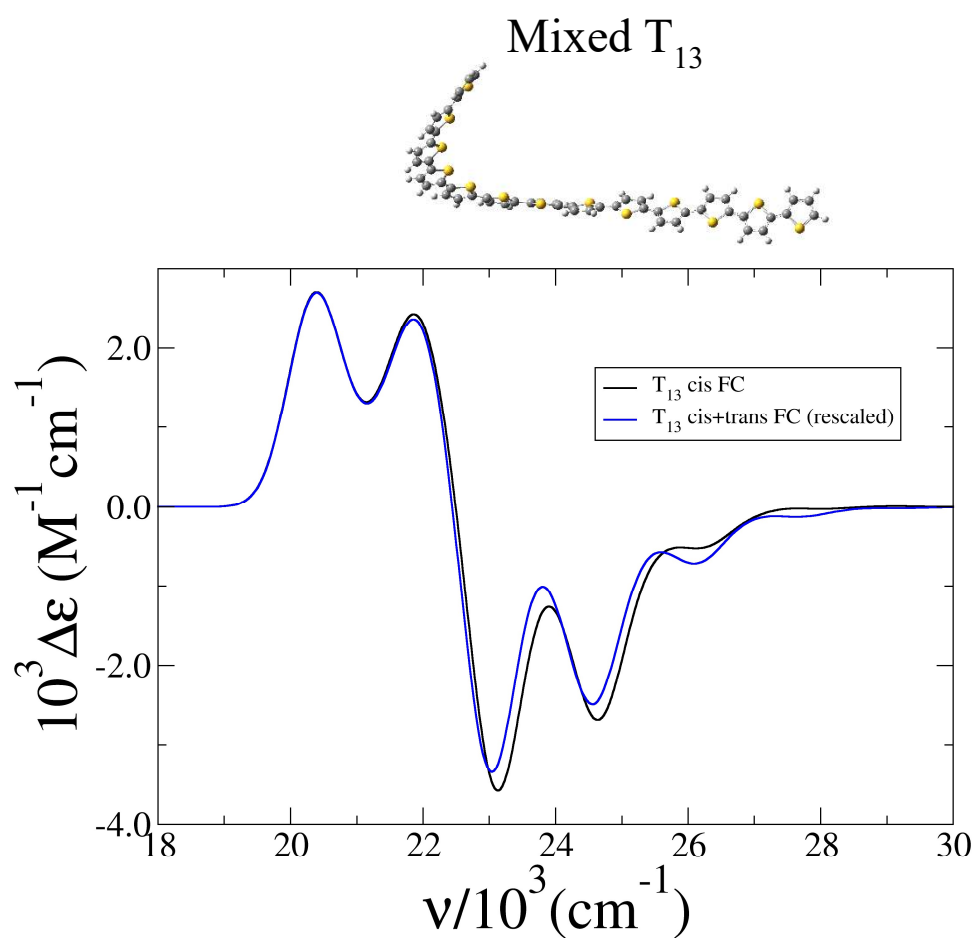

**Figure S29.** ECD spectra of *class II* structures cisoid  $T_{13}$  and mixed  $T_{13}$ . The latter was rescaled and shifted to overlap with the first peak of cisoid  $T_{13}$ . Both were computed at  $\theta=15^\circ$ , 0K and broadened with a Gaussian with HWHM=450  $cm^{-1}$ . Inter-ring torsion angles are considered frozen during the transition.

Table S2. Vertical energies (in eV) for the unmethyled (T) and polymethyled (3-methylT) transoid and cisoid T<sub>13</sub> structures at  $\theta=15^\circ$ .

|    | Transoid        |                           | Cisoid          |                           |
|----|-----------------|---------------------------|-----------------|---------------------------|
|    | T <sub>13</sub> | (3-methylT) <sub>13</sub> | T <sub>13</sub> | (3-methylT) <sub>13</sub> |
| S1 | 2.7657          | 2.7176                    | 2.6940          | 2.6803                    |
| S2 | 3.0409          | 2.9947                    | 2.9922          | 2.9669                    |
| S3 | 3.3382          | 3.2931                    | 3.3247          | 3.2979                    |

## Analysis of Molecular Orbitals and transition densities for T<sub>7</sub> and T<sub>13</sub>.

The Kohn-Sham Molecular Orbitals (MOs) more involved in the S1-S3 electronic states of T<sub>7</sub> and T<sub>13</sub> are shown in Figures S30-S33 for *transoid* twisted ribbons and *cisoid* helices of T<sub>7</sub> and T<sub>13</sub> with  $\theta = 10, 20$  and  $30$  degrees. For  $\theta = 20$  degrees a more in-depth analysis is performed in Figures S34-S39 and Table S3. The description of S1-S3 transitions in terms of excitations between MOs (reported in Table S3) is pretty similar for both *transoid* and *cisoid* structures. S1 is always a HOMO  $\rightarrow$  LUMO transition, S2 involves both HOMO  $\rightarrow$  LUMO+1 and HOMO-1  $\rightarrow$  LUMO and S3 arises from HOMO  $\rightarrow$  LUMO+2, HOMO-1  $\rightarrow$  LUMO+1 and HOMO-2  $\rightarrow$  LUMO excitations. Inspection of the Figures S30-S33 show that the shapes of the MOs themselves are very similar; therefore it is not surprising that even the S0  $\rightarrow$  S<sub>n</sub> (n=1,2,3) transition densities look pretty similar for *transoid* and *cisoid* helices. Figures S34-S38 show that *transoid* structures mostly extend in the direction of the non-total symmetric Y axis. On the contrary, *cisoid* helices extend along all the three axes (Z is the total symmetric one). The X, Y and Z Cartesian components of the electric transition moment associated to these transitions can be computed by the integral of the transition densities ( $\rho_{0n}(X,Y,Z)$ ) multiplied by the value of the corresponding coordinate  $\mu_{0n}(X) \propto \int X \rho_{0n}(X,Y,Z) d\mathbf{r}$ ,  $\mu_{0n}(Y) \propto \int Y \rho_{0n}(X,Y,Z) d\mathbf{r}$ ,  $\mu_{0n}(Z) \propto \int Z \rho_{0n}(X,Y,Z) d\mathbf{r}$ . The different spatial arrangements of *transoid* and *cisoid* structures have a deep impact on these integrands. Consider T<sub>7</sub>: S1 state belongs to B irreps. Accordingly, it can have X and Y components of the transition dipole. Due to the almost linear structure of the *transoid* twisted ribbon, oriented along Y, the transition is almost completely Y-polarized.  $\mu_{01}(Y)$  is the largest component also for the *cisoid* structure but in this case also  $\mu_{01}(X)$  is significant. Notice, on the contrary, that  $Z \rho_{01}(X,Y,Z)$  is an odd function and therefore its integral is zero. The same is true for  $X \rho_{02}(X,Y,Z)$  and  $Y \rho_{02}(X,Y,Z)$  of both *transoid* and *cisoid* structures, as expected since in both cases, S2 belongs to the A irreps. However,  $Z \rho_{02}(X,Y,Z)$  shows a large difference in the two cases. In fact *cisoid* helix is much more elongated along the Z axis so that the same transition density is actually more stretched along such axis in *cisoid* than in *transoid* structures. Multiplication by "Z" therefore enhances the contributions of the atoms at large positive and negative Z values, giving a transition dipole 70-80 times larger in *cisoid* helix. The same phenomenon occurs for S1 and S2 of *cisoid* and *transoid* T<sub>13</sub>. In the *cisoid* arrangement of T<sub>13</sub> however, also S3 (B symmetry) acquires a remarkable transition dipole. Interestingly, even if  $Y \rho_{03}(X,Y,Z)$  shows bigger positive and negative lobes than  $X \rho_{03}(X,Y,Z)$  the X component of the transition dipole is

much larger than the Y one. This result can be rationalized noticing that while in  $Y\rho_{03}(X,Y,Z)$  there is an alternation of violet (negative) and cyan (positive) lobes, in  $X\rho_{03}(X,Y,Z)$  the negative lobes largely dominate, and in fact  $\mu_{03}(X)$  is large and negative. Interestingly the plot for cisoid  $T_7$  and  $T_{13}$  shows that the transition densities of the former multiplied by X and Y show an alternation of positive and negative lobes, so that their integral is small. With respect to  $T_7$ , the  $T_{13}$  structure exhibits left and right wings that elongate in X and Y directions. Its transition density multiplied by X is mainly negative on these extreme parts of the molecule (absent in  $T_7$ ) and this explains why S3 acquires a strong negative X component of the transition dipole that is not seen in  $T_7$  (Figure S39).

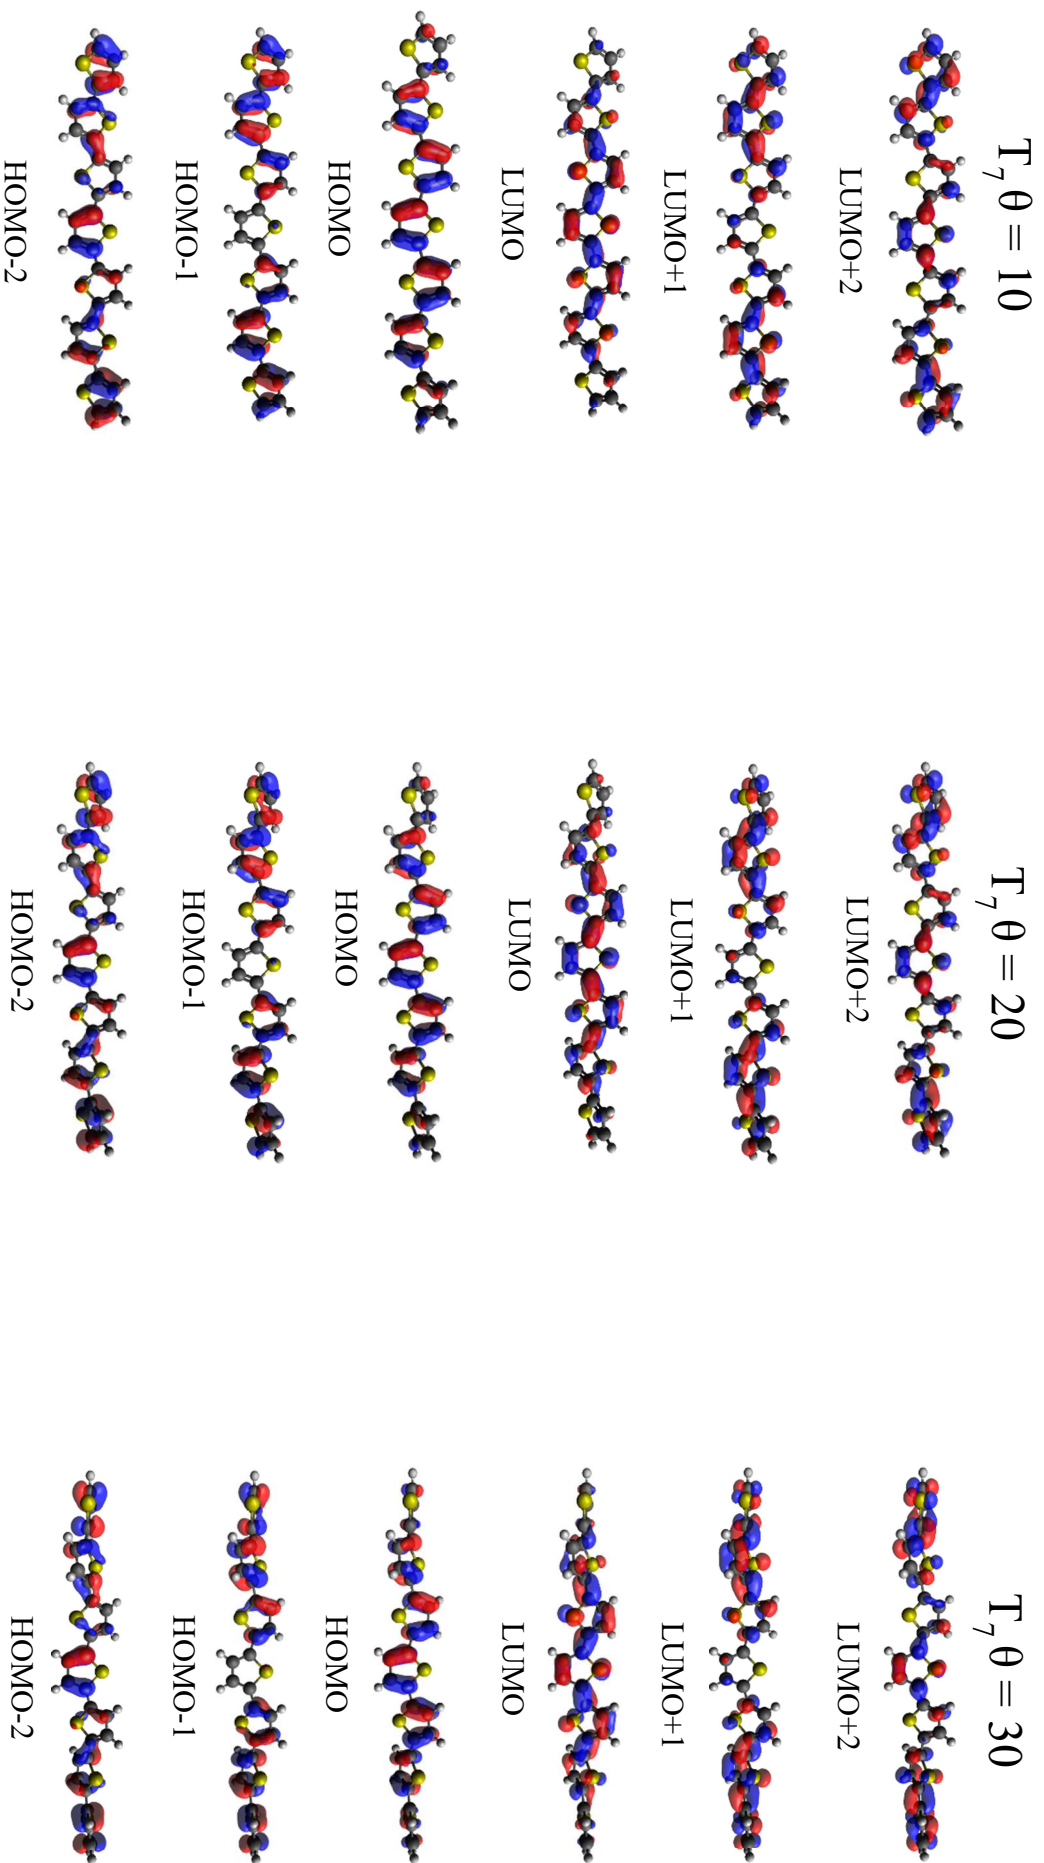

**Figure S30.** Transoid  $T_7$  Main orbitals involved in the S1 (HOMO  $\rightarrow$  LUMO), S2 (HOMO  $\rightarrow$  LUMO +1, HOMO-1, LUMO) and S3 (HOMO  $\rightarrow$  LUMO+2, HOMO-1  $\rightarrow$  LUMO, HOMO-2  $\rightarrow$  LUMO) transitions at different torsion angles. Isovalue = 0.03.

$T_{13} \theta = 10$

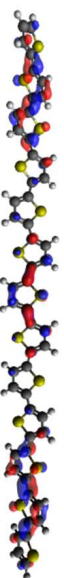

LUMO+2

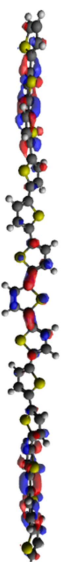

LUMO+2

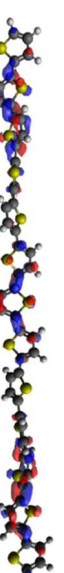

$T_{13} \theta = 30$

LUMO+2

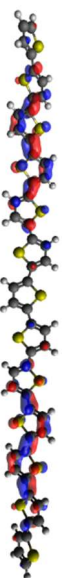

LUMO+1

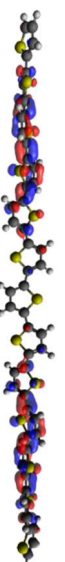

LUMO+1

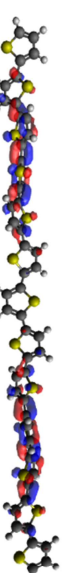

LUMO+1

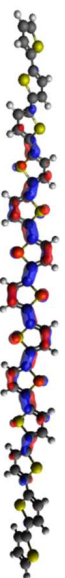

LUMO

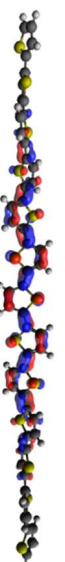

LUMO

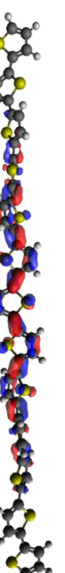

LUMO

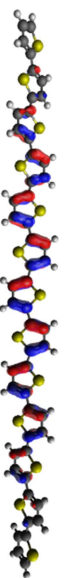

HOMO

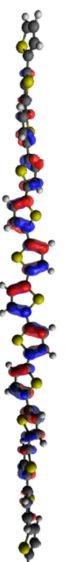

HOMO

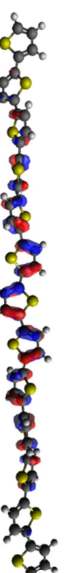

HOMO

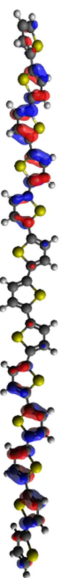

HOMO-1

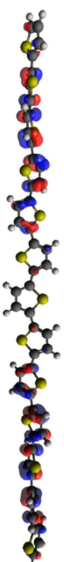

HOMO-1

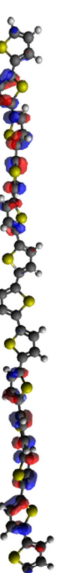

HOMO-1

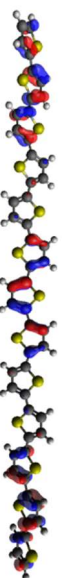

HOMO-2

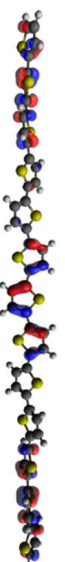

HOMO-2

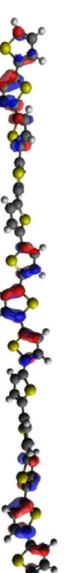

HOMO-2

**Figure S31.** Transoid  $T_{13}$  Main orbitals involved in the S1 (HOMO  $\rightarrow$  LUMO, HOMO-1  $\rightarrow$  LUMO+1), S2 (HOMO  $\rightarrow$  LUMO+1, HOMO-1, LUMO) and S3 (HOMO  $\rightarrow$  LUMO+2, HOMO-1  $\rightarrow$  LUMO, HOMO-2  $\rightarrow$  LUMO) transitions at different torsion angles. Isovalue = 0.03



$T_7 \theta = 10$

$T_7 \theta = 20$

$T_7 \theta = 30$

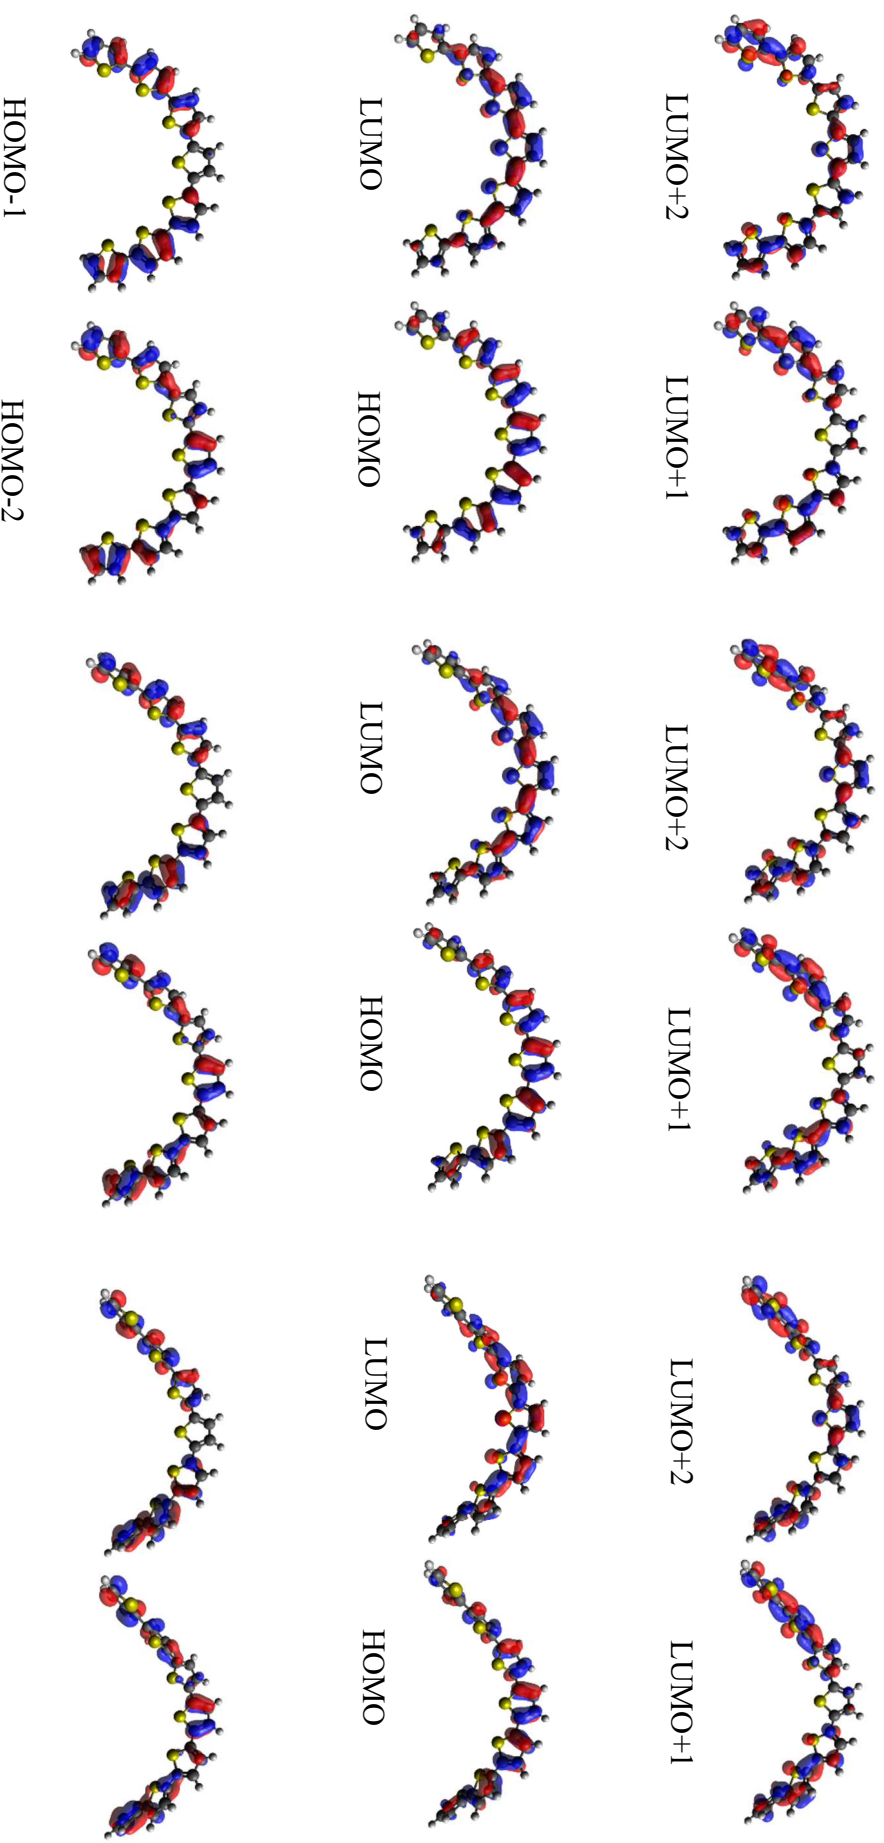

**Figure S32.** Cisoid  $T_7$  Main orbitals involved in the S1 (HOMO  $\rightarrow$  LUMO), S2 (HOMO  $\rightarrow$  LUMO +1, HOMO-1 $\rightarrow$ LUMO) and S3 (HOMO  $\rightarrow$  LUMO+2, HOMO-1  $\rightarrow$  LUMO, HOMO-2  $\rightarrow$  LUMO) transitions at different torsion angles. Isovalue = 0.03.

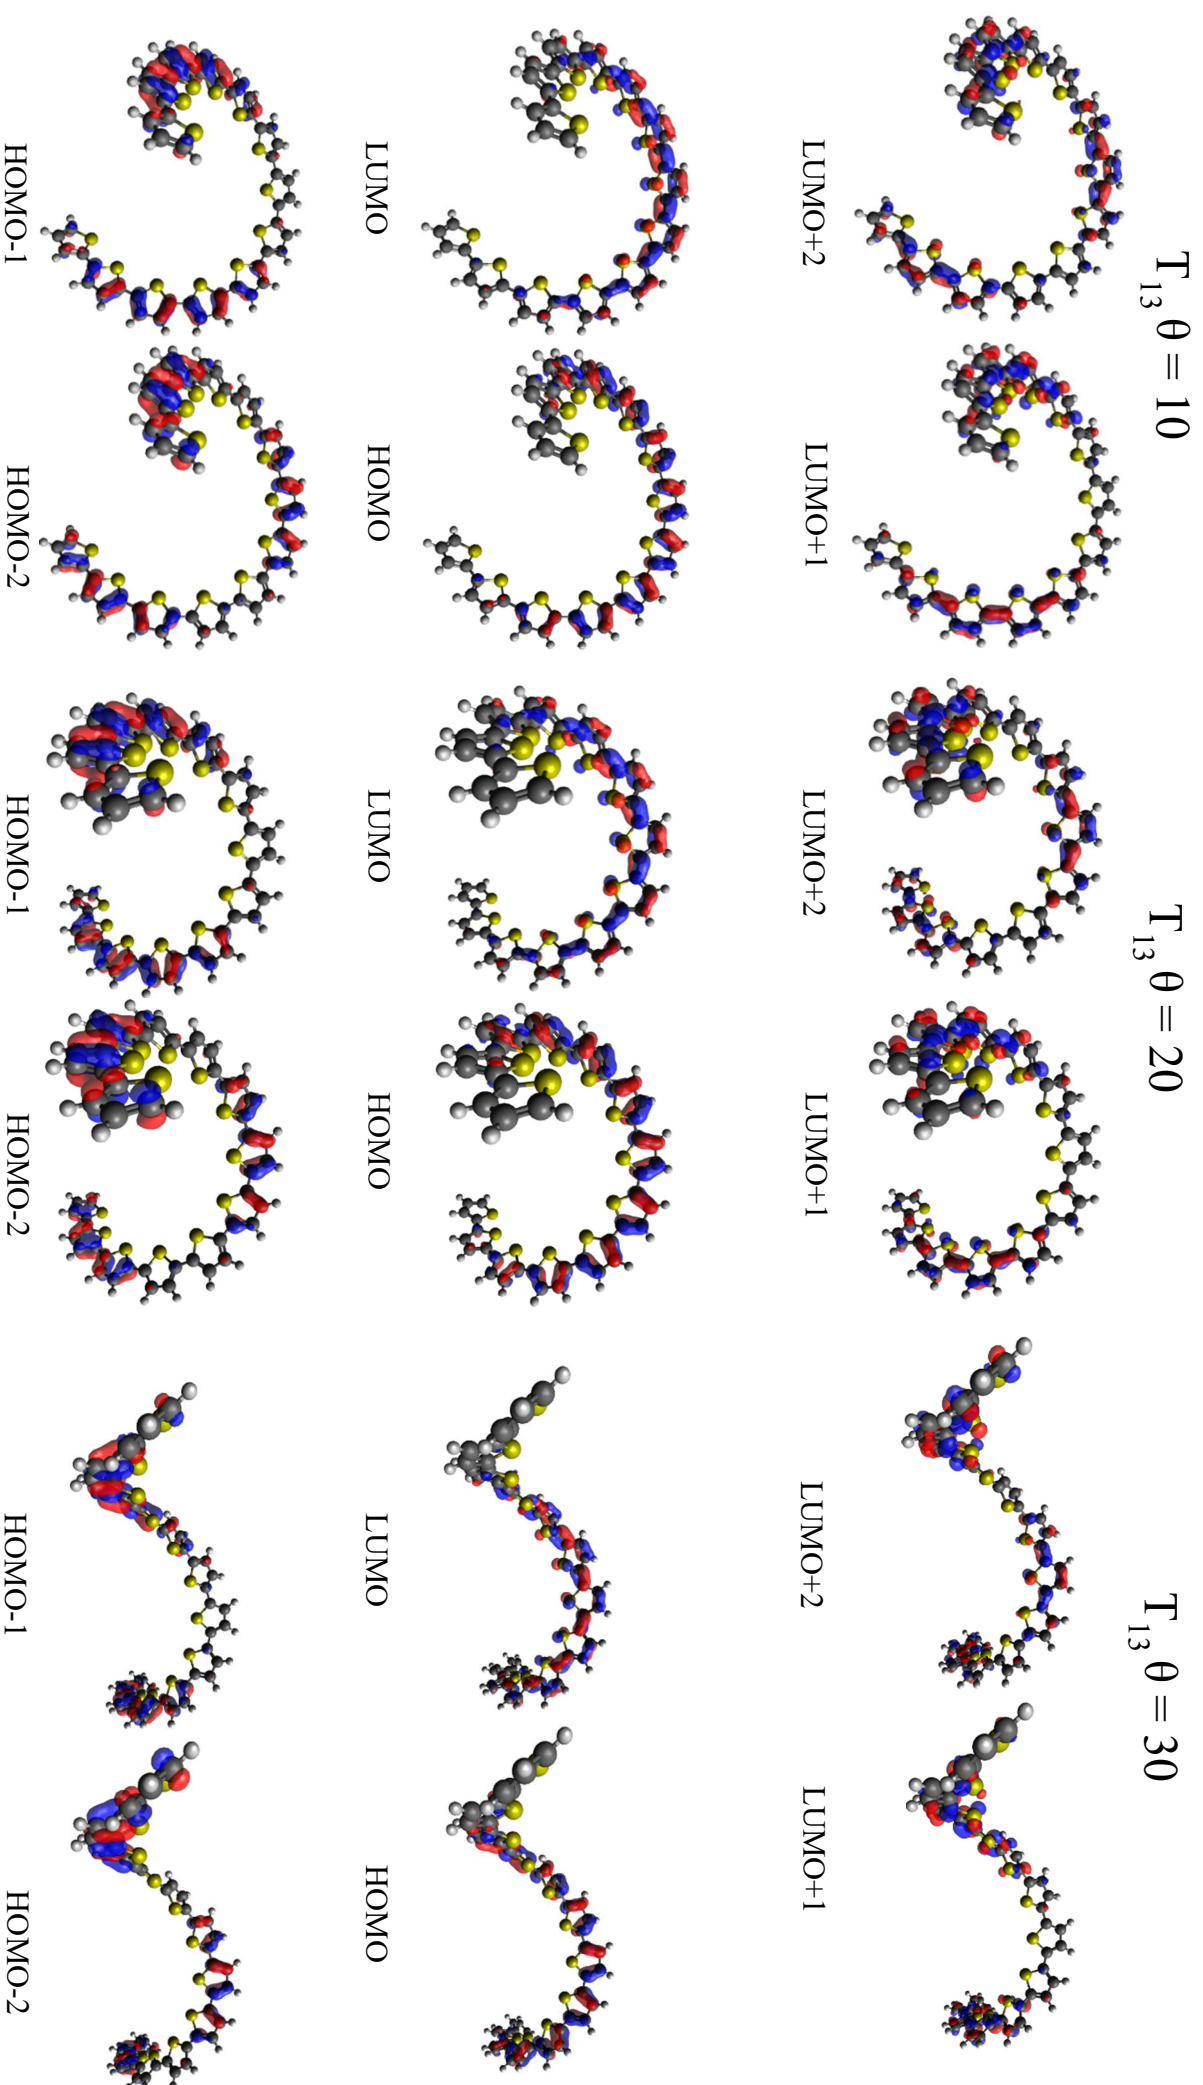

**Figure S33.** Cisoid  $T_{13}$  Main orbitals involved in the S1 (HOMO  $\rightarrow$  LUMO, HOMO-1  $\rightarrow$  LUMO+1), S2 (HOMO  $\rightarrow$  LUMO +1, HOMO-1  $\rightarrow$  LUMO) and S3 (HOMO  $\rightarrow$  LUMO+2, HOMO-1  $\rightarrow$  LUMO, HOMO-2  $\rightarrow$  LUMO) transitions at different torsion angles. Isovalue = 0.03

# Trans-T<sub>7</sub> S1

## Transition Density

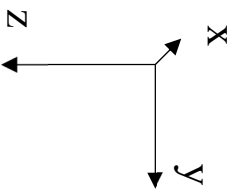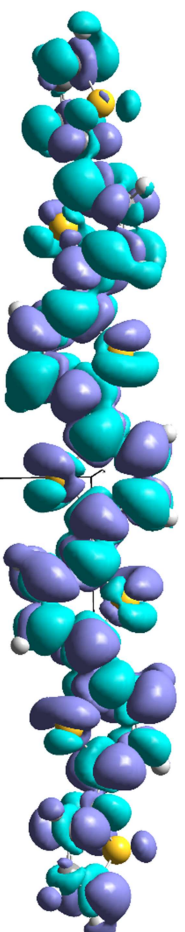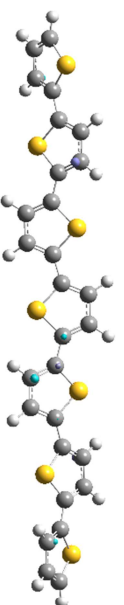

X

0.1134

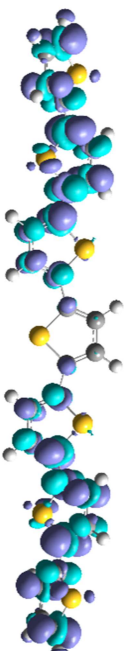

Y

-5.6538

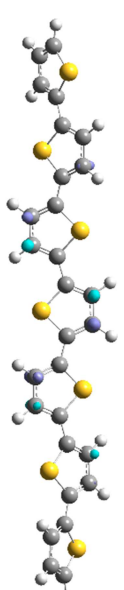

Z

0.0000

# Cis-T<sub>7</sub> S1

## Transition Density

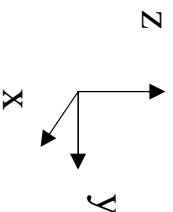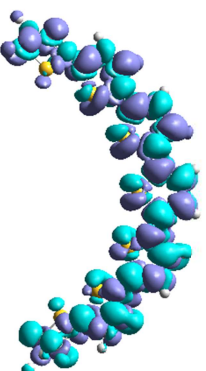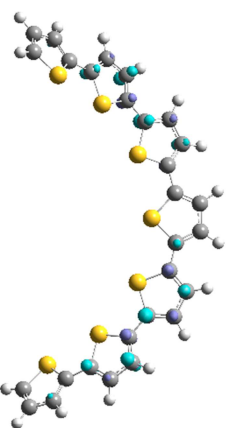

X

0.7719

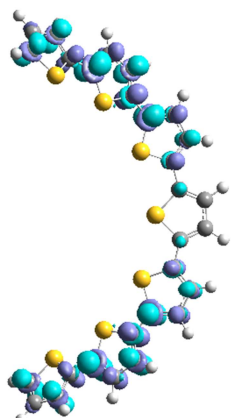

Y

4.5666

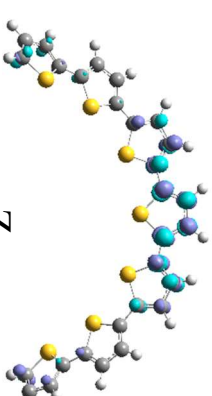

Z

0.0000

**Figure S34.** T<sub>7</sub> at  $\theta = 20^\circ$  : Plot of the transition densities involved in the S1 (HOMO  $\rightarrow$  LUMO) and of their product by the Cartesian coordinates . The components of the transition electric dipole moment are shown below. Isovalue = 0.0004 for all plots except for the transition densities of transoid T<sub>7</sub> multiplied by X, Y and Z, whose isovalue is 0.00004.

# Trans-T<sub>7</sub> S<sub>2</sub>

## Transition Density

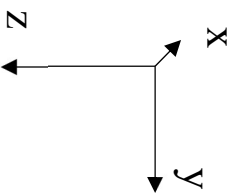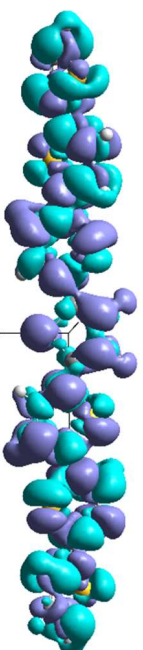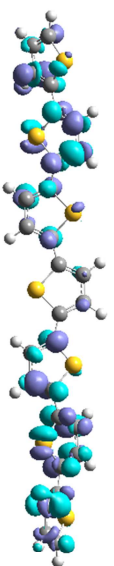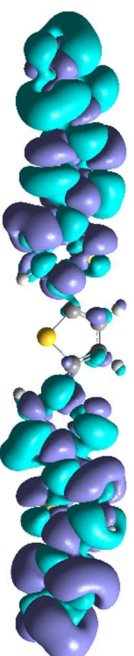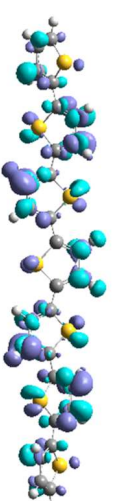

X

0.0000

Y

0.0000

Z

0.0420

# Cis-T<sub>7</sub> S<sub>2</sub>

## Transition Density

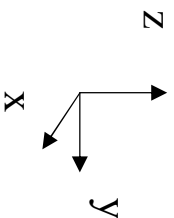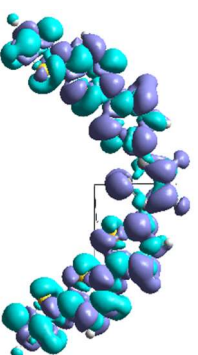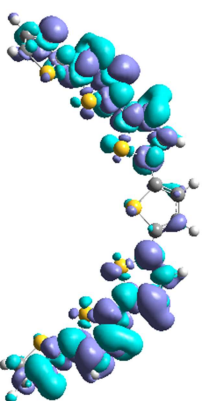

X

0.0000

Y

0.0000

Z

-3.0568

**Figure S35.** T<sub>7</sub> at  $\theta = 20^\circ$  : Plot of the transition densities involved in the S<sub>2</sub> (HOMO  $\rightarrow$  LUMO+1, HOMO-1  $\rightarrow$  LUMO) and of their product by the Cartesian coordinates . The components of the transition electric dipole moment are shown below. Isovalue = 0.0004 for all plots except for the transition densities of transoid T<sub>7</sub> multiplied by X, Y and Z, whose isovalue is 0.00004.



# Trans-T<sub>13</sub> S1

## Transition Density

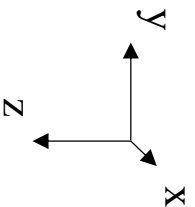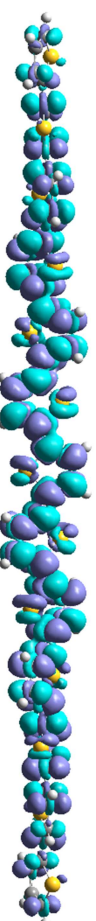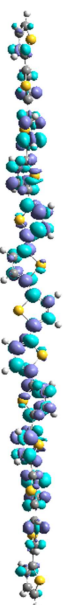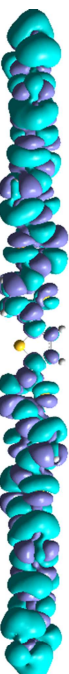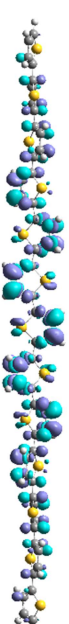

X

0.1120

Y

8.3932

Z

0.0000

# Cis-T<sub>13</sub> S1

## Transition Density

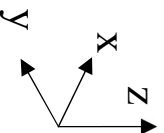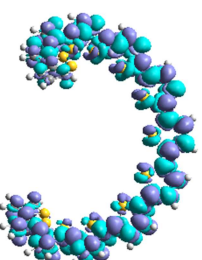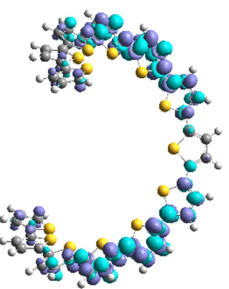

X

0.0591

Y

5.0954

Z

0.0000

**Figure S36.** T<sub>13</sub> at  $\theta = 20^\circ$  : Plot of the transition densities involved in the S1 (HOMO  $\rightarrow$  LUMO) and of their product by the Cartesian coordinates . The components of the transition electric dipole moment are shown below. Isovalue = 0.0004 for all plots except for the transition densities of transoid T<sub>13</sub> multiplied by X, Y and Z, whose isovalue is 0.00004.

# Trans-T<sub>13</sub> S2

## Transition Density

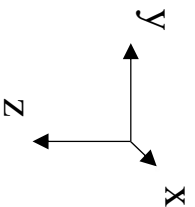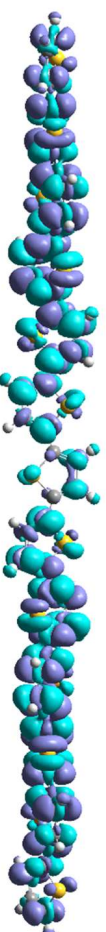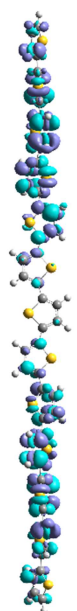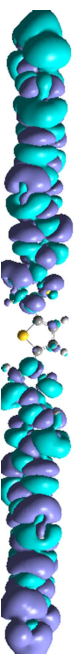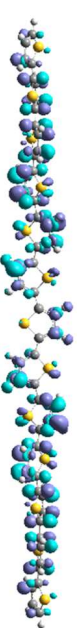

X

0.0000

Y

0.0000

Z

-0.0299

# Cis-T<sub>13</sub> S2

## Transition Density

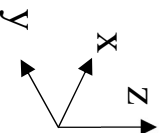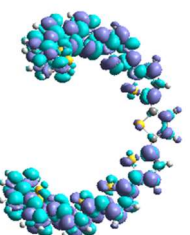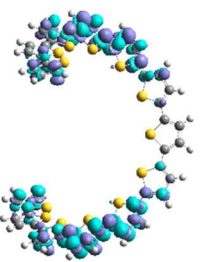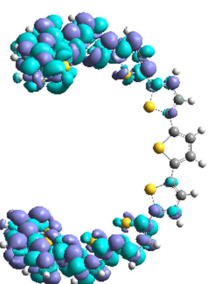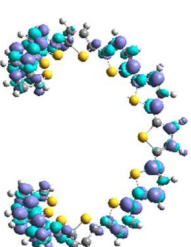

X

0.0000

Y

0.0000

Z

-4.1470

**Figure S37.** T<sub>13</sub> at  $\theta = 20^\circ$  : Plot of the transition densities involved in the S2 (HOMO  $\rightarrow$  LUMO+1, HOMO-1  $\rightarrow$  LUMO) and of their product by the Cartesian coordinates . The components of the transition electric dipole moment are shown below. Isovalue = 0.0004 for all plots except for the transition densities of transoid T<sub>13</sub> multiplied by X, Y and Z, whose isovalue is 0.00004.

# Trans-T<sub>13</sub> S3

## Transition Density

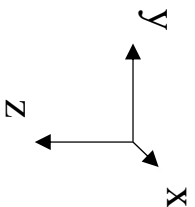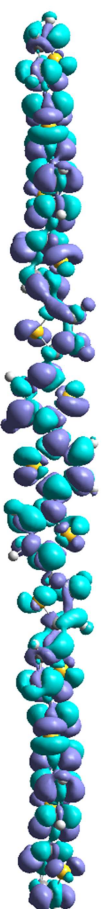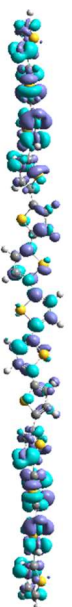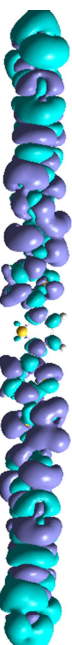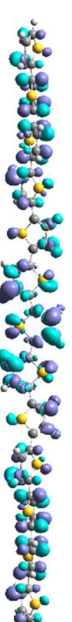

X

0.0729

Y

2.1212

Z

0.0000

## Cis-T<sub>13</sub> S3

## Transition Density

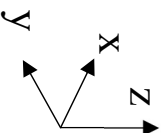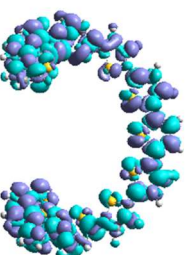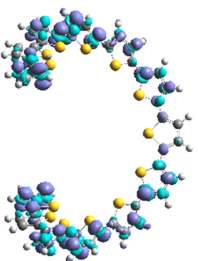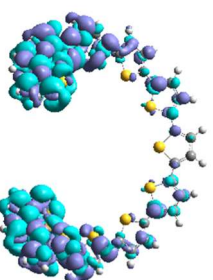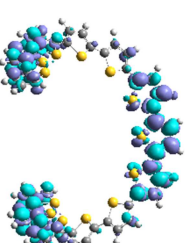

X

-4.5303

Y

0.4749

Z

-0.0000

**Figure S38.** T<sub>13</sub> at  $\theta = 20^\circ$ : Plot of the transition densities involved in the S3 (HOMO  $\rightarrow$  LUMO+2, HOMO-1  $\rightarrow$  LUMO+1, HOMO-2  $\rightarrow$  LUMO) and of their product by the Cartesian coordinates. The components of the transition electric dipole moment are shown below. Isovalue = 0.0004 for all plots except for the transition densities of transoid T<sub>13</sub> multiplied by X, Y and Z, whose isovalue is 0.00004.

## Cis-T<sub>7</sub> S3

### Transition Density

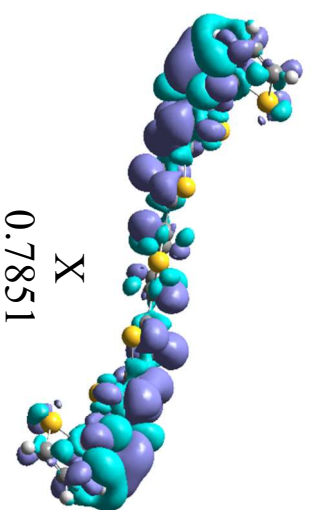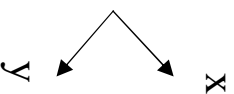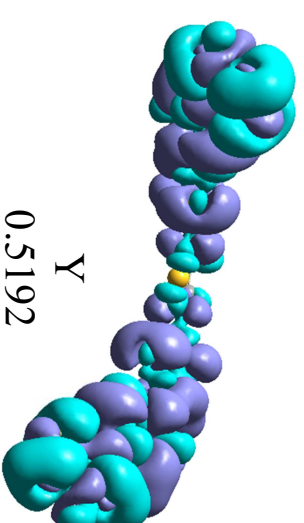

Y  
0.5192

## Cis-T<sub>13</sub> S3

### Transition Density

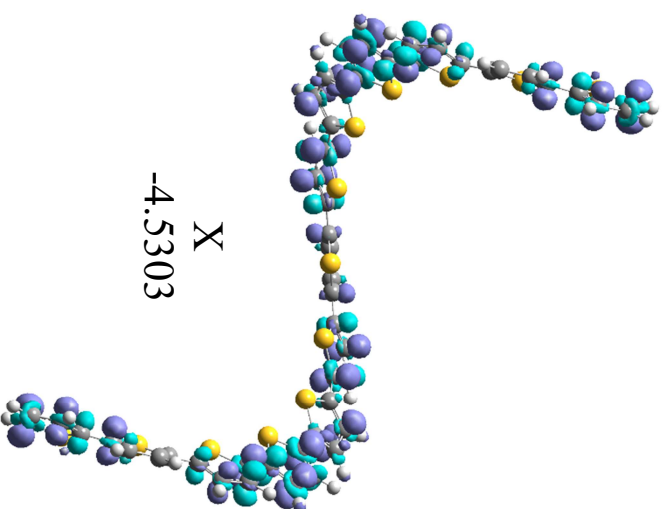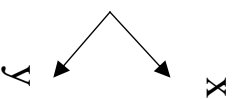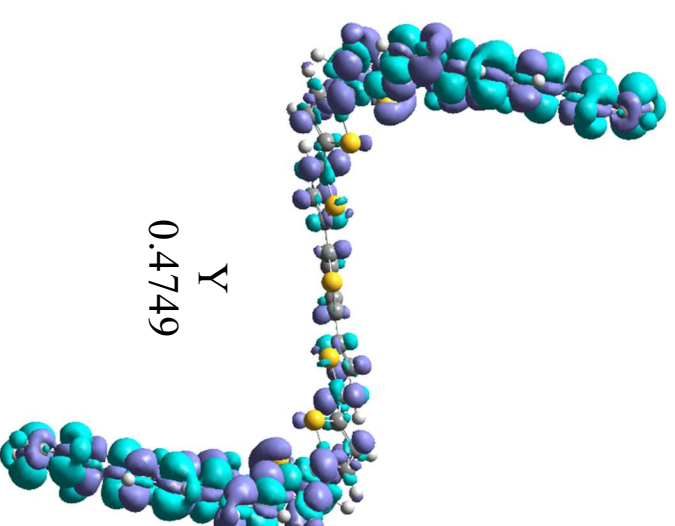

Y  
0.4749

**Figure S39.** T<sub>7</sub> and T<sub>13</sub> at  $\theta=20^\circ$  : Plot of the transition densities multiplied by the X and Y Cartesian coordinates involved in S3 (HOMO  $\rightarrow$  LUMO+2, HOMO-1  $\rightarrow$  LUMO+1, HOMO-2  $\rightarrow$  LUMO). The components of the transition electric dipole moment are shown below. Isovalue = 0.00004 for T<sub>7</sub> and 0.0004 for T<sub>13</sub>. The components of the transition electric dipole moment are shown below.



**Table S3.**  $T_7$  and  $T_{13}$  data for the three lowest energy excited states at  $\theta = 20^\circ$ . (a) Composition of the main transitions in terms of the molecular orbitals involved. (b) Vertical transition energies in eV. (c) Oscillator strengths. (d) Rotatory strengths.

| (a)           |                                                                                   |  |  |  |
|---------------|-----------------------------------------------------------------------------------|--|--|--|
| Excited State | Composition                                                                       |  |  |  |
| S1            | HOMO $\rightarrow$ LUMO                                                           |  |  |  |
| S2            | HOMO $\rightarrow$ LUMO+1, HOMO-1 $\rightarrow$ LUMO                              |  |  |  |
| S3            | HOMO $\rightarrow$ LUMO+2, HOMO-1 $\rightarrow$ LUMO+1, HOMO-2 $\rightarrow$ LUMO |  |  |  |

  

| (b) |                                 |          |          |          |
|-----|---------------------------------|----------|----------|----------|
|     | Vertical Transition Energy (eV) |          |          |          |
|     | $T_7$                           |          | $T_{13}$ |          |
|     | Cisoid                          | Transoid | Cisoid   | Transoid |
| S1  | 3.0275                          | 3.0735   | 2.8060   | 2.8664   |
| S2  | 3.6187                          | 3.6179   | 3.0839   | 3.1272   |
| S3  | 4.1718                          | 4.1298   | 3.3996   | 3.4097   |

  

| (c) |                     |          |          |          |
|-----|---------------------|----------|----------|----------|
|     | Oscillator Strength |          |          |          |
|     | $T_7$               |          | $T_{13}$ |          |
|     | Cisoid              | Transoid | Cisoid   | Transoid |
| S1  | 1.591               | 2.4079   | 1.7851   | 4.948    |
| S2  | 0.8284              | 0.0002   | 1.2994   | 0.0001   |
| S3  | 0.0969              | 0.1863   | 1.7282   | 0.3763   |

  

| (d) |                                     |           |            |           |
|-----|-------------------------------------|-----------|------------|-----------|
|     | Rotatory Strength ( $10^{-40}$ cgs) |           |            |           |
|     | $T_7$                               |           | $T_{13}$   |           |
|     | Cisoid                              | Transoid  | Cisoid     | Transoid  |
| S1  | 1018.8830                           | -228.5557 | 8705.1499  | -450.4941 |
| S2  | -1631.8471                          | -3.5887   | -9073.8208 | 1.8572    |
| S3  | 697.0429                            | -8.0884   | -1053.0201 | -40.4677  |
